# Supplementary material for: Does hospital information technology infrastructure promote the implementation of clinical practice guidelines? A multicentre observational study of Japanese hospitals
Source: PubMed Central journal article supplement — BMJ Open. 2019 Jun 14;9(6):e024700. doi: 10.1136/bmjopen-2018-024700 (PMC6588970; doi:10.1136/bmjopen-2018-024700), 2019-06-14
Supplement: bmjopen-2018-024700.draft_revisions.pdf [file bmjopen-2018-024700.draft_revisions.pdf]

# BMJ Open

BMJ Open is committed to open peer review. As part of this commitment we make the peer review history of every article we publish publicly available.

When an article is published we post the peer reviewers' comments and the authors' responses online. We also post the versions of the paper that were used during peer review. These are the versions that the peer review comments apply to.

The versions of the paper that follow are the versions that were submitted during the peer review process. They are not the versions of record or the final published versions. They should not be cited or distributed as the published version of this manuscript.

BMJ Open is an open access journal and the full, final, typeset and author-corrected version of record of the manuscript is available on our site with no access controls, subscription charges or pay-per-view fees (<http://bmjopen.bmj.com>).

If you have any questions on BMJ Open's open peer review process please email [info.bmjopen@bmj.com](mailto:info.bmjopen@bmj.com)

# BMJ Open

## Does Hospital Information Technology Infrastructure Promote the Implementation of Clinical Practice Guidelines? A Multicenter Observational Study of Japanese Hospitals

|                               |                                                                                                                                                                                                                                                                                                                                                                                                                                                                                                                                                            |
|-------------------------------|------------------------------------------------------------------------------------------------------------------------------------------------------------------------------------------------------------------------------------------------------------------------------------------------------------------------------------------------------------------------------------------------------------------------------------------------------------------------------------------------------------------------------------------------------------|
| Journal:                      | <i>BMJ Open</i>                                                                                                                                                                                                                                                                                                                                                                                                                                                                                                                                            |
| Manuscript ID                 | bmjopen-2018-024700                                                                                                                                                                                                                                                                                                                                                                                                                                                                                                                                        |
| Article Type:                 | Research                                                                                                                                                                                                                                                                                                                                                                                                                                                                                                                                                   |
| Date Submitted by the Author: | 12-Jun-2018                                                                                                                                                                                                                                                                                                                                                                                                                                                                                                                                                |
| Complete List of Authors:     | Sasaki, Noriko; Kyoto University Graduate School of Medicine, Department of Healthcare Economics and Quality Management<br>Yamaguchi, Naohito; Japan Council for Quality Health Care, Tokyo, Japan<br>Okumura, Akiko; Japan Council for Quality Health Care, Tokyo, Japan<br>Yoshida, Masahiro; Japan Council for Quality Health Care, Tokyo, Japan<br>Sugawara, Hiroyuki; Japan Council for Quality Health Care, Tokyo, Japan<br>Imanaka, Yuichi; Kyoto University Graduate School of Medicine, Department of Healthcare Economics and Quality Management |
| Keywords:                     | Clinical practice guidelines, evidence-based practice, quality indicators, healthcare quality, hospital IT infrastructure, evidence-practice gaps                                                                                                                                                                                                                                                                                                                                                                                                          |
|                               |                                                                                                                                                                                                                                                                                                                                                                                                                                                                                                                                                            |

SCHOLARONE™  
Manuscripts

1  
2  
3  
4 1 **Does Hospital Information Technology Infrastructure Promote the Implementation of**  
5  
6 2 **Clinical Practice Guidelines? A Multicenter Observational Study of Japanese Hospitals**  
7  
8

9 3

10  
11  
12 4 Noriko Sasaki, MD, PhD,<sup>1</sup> Naohito Yamaguchi, MD, PhD,<sup>2</sup> Akiko Okumura, MPH,<sup>2</sup>  
13

14  
15 5 Masahiro Yoshida, MD, PhD,<sup>2</sup> Hiroyuki Sugawara, MMS,<sup>2</sup> and Yuichi Imanaka, MD, PhD<sup>1,2</sup>  
16

17  
18 6 <sup>1</sup>Department of Healthcare Economics and Quality Management,  
19

20  
21 7 Kyoto University Graduate School of Medicine, Kyoto, Japan  
22

23  
24 8 <sup>2</sup> Japan Council for Quality Health Care, Tokyo, Japan  
25

26  
27 9  
28

29  
30 10  
31

32  
33 11  
34

35  
36 12  
37

38 13 Correspondence to: Professor Yuichi Imanaka; [imanaka-y@umin.net](mailto:imanaka-y@umin.net)  
39  
40  
41  
42  
43  
44  
45  
46  
47  
48  
49  
50  
51  
52  
53  
54  
55  
56  
57  
58  
59  
60

1  
2  
3  
4 1 **Abstract**

5  
6 2 **Objectives:** It remains unclear whether insufficient information technology (IT) infrastructure  
7  
8  
9 3 of hospitals hinder implementation of clinical practice guidelines (CPGs) and affects health  
10  
11  
12 4 care quality. The objectives of this study were to describe the present state of IT infrastructure  
13  
14  
15 5 provided in acute care hospitals across Japan and to investigate possible determinants of  
16  
17  
18 6 healthcare quality.

19  
20 7 **Methods:** A questionnaire survey of hospital administrators was conducted in 2015 to gather  
21  
22  
23 8 information on hospital-level policies and elements of IT infrastructure. We calculated each  
24  
25  
26 9 respondent's number of positive responses to the survey topics. Next, a composite quality  
27  
28  
29 10 indicator score of hospital adherence to CPGs for perioperative antibiotic prophylaxis was  
30  
31  
32 11 calculated using secondary administrative data. Based on this quality indicator score, we  
33  
34  
35 12 performed a chi-squared automatic interaction detection (CHAID) analysis to identify  
36  
37  
38 13 determinants of hospital healthcare quality. The independent variables included hospital size  
39  
40  
41 14 and teaching status in addition to hospital policies and elements of IT infrastructure.

42  
43 15 **Results:** Wide variations were observed in the availability of various IT infrastructure  
44  
45  
46 16 elements across hospitals, especially in local area network availability and access to paid  
47  
48  
49 17 evidence databases. The CHAID analysis showed that hospitals with a high level of access to  
50  
51  
52 18 paid databases and Internet were strongly associated with increased care quality in larger or  
53  
54  
55 19 teaching hospitals.

1  
2  
3  
4 1 **Conclusions:** Hospitals with superior IT infrastructure may provide high-quality care. This  
5  
6 2 allows clinicians to easily access the latest information on evidence-based medicine and  
7  
8  
9 3 facilitate the dissemination of CPGs. The systematic improvement of hospital IT  
10  
11  
12 4 infrastructure may promote CPG use and narrow the evidence-practice gaps.

13  
14  
15 5 **Key words:** Clinical practice guidelines; evidence-based practice; quality indicators;  
16  
17 6 healthcare quality; hospital IT infrastructure; evidence-practice gaps.  
18  
19  
20  
21 7

## 1 **Strengths and limitations of this study**

- 2 ● In this multicenter study, we observed wide variations in the provision of IT infrastructure  
3 across acute care hospitals in Japan.
- 4 ● Hospitals with superior IT infrastructure tended to have higher adherence to CPGs for  
5 perioperative antibiotic prophylaxis.
- 6 ● We found that high level of access to paid medical evidence databases and accessibility to  
7 the Internet were the key factors of care quality in acute care hospitals using the CHAID  
8 analysis.
- 9 ● We shed light on new knowledge that establishment of hospital IT infrastructure for  
10 medical information retrieval may support greater awareness and adherence to CPGs in  
11 clinicians and narrow the evidence-practice gaps.
- 12 ● The QI of the adherence to the CPGs for perioperative antibiotic use may describe only  
13 one aspect of healthcare quality and the results from the survey conducted in Japan may  
14 limit the generalizability.

## 1 **1. Introduction**

2 Due to the flood of renewed medical information and frequent updates to clinical practice  
3 guidelines (CPGs) in the Internet era, clinicians can find it difficult to keep abreast of the  
4 latest evidence. The availability and usability of the hospital information technology (IT)  
5 infrastructure such as wireless local area networks (LAN) and medical evidence databases  
6 may affect the ability of clinicians to update their knowledge and practice, which can  
7 influence the quality of provided care. These infrastructure elements may facilitate  
8 accessibility to various updated CPGs, which would be essential for CPG implementation in  
9 daily practice [1].

10 CPGs for various diseases have been developed worldwide not only to help clinicians but  
11 also to promote shared decision making with patients [2-4]. However, CPGs continue to be  
12 underused even in developed countries despite intense efforts toward their development and  
13 dissemination over the past several decades. These gaps between medical evidence and  
14 clinical practice (i.e., “evidence-practice gaps”) can lead to the provision of substandard or  
15 potentially harmful treatments to patients [5-11]. System-level barriers as well as  
16 individual-level barriers to evidence-based practice have been revealed in previous studies  
17 [12-14,17]. For example, institutional equipment, technological capital, accessibility to  
18 guideline-related resources are noted to be important in addition to individual awareness,  
19 familiarity and agreement to the contents [15-17]. Clinical quality indicators (QIs) can

1 monitor clinicians' adherence to the guidelines, but they are not necessarily utilized to assess  
2 guideline implementation [18]. Furthermore, there are no clear evidence whether hospital IT  
3 infrastructure may affect quality of provided care using these QIs.

4 On the other hand, health IT implementation studies are growing and they report positive  
5 effects on quality, safety and efficiency [19-24]. However, most of these studies have focused  
6 on clinical decision support systems, order entry, telecommunication systems, e-Prescriptions  
7 [19,20] and strategic management systems [21]. It therefore remains unclear as to whether the  
8 lack of an adequate IT infrastructure for medical information retrieval is a crucial  
9 system-level barrier for CPG implementation. In Japan, over 180 evidence-based CPGs have  
10 been assessed and disseminated by the Medical Information Network Distribution Service  
11 (Minds) Guideline Center [22] over the last decade, but the actual use of these CPGs in daily  
12 clinical practice also remains unknown.

13 This multicenter study aimed to describe the present state of IT infrastructure provided in  
14 Japanese acute care hospitals and to investigate the possible determinants of healthcare quality,  
15 including hospital size, hospital policies toward promoting evidence-based practice, and  
16 hospital IT infrastructure.

17





1 discussions with experts, and semi-structured face-to-face interviews with several hospital  
2 administrators and IT managers from 5 major teaching hospitals. Survey respondents were  
3 asked to answer questions from a concise list about their institution and policies as  
4 representatives of their hospital.

5

## 6 ***2.2. Hospital policy and IT infrastructure***

7 In order to identify each hospital's policies toward promoting evidence-based practice, the  
8 questionnaire included items on whether the hospital has an explicit policy to enhance IT  
9 infrastructure to improve accessibility to medical information, explicitly recommends the  
10 utilization of evidence-based medicine, and explicitly recommends to use CPGs.

11 The questionnaire was also designed to focus on the following 3 elements of hospital IT  
12 infrastructure: (i) accessibility to the Internet and other information sources, including  
13 wired/wireless LAN availability; (ii) access to paid medical evidence databases in English and  
14 Japanese; and (iii) medical library and intranet usability, such as the availability of a  
15 well-organized intranet interface, number of full-time medical librarians, and activities for  
16 improving the medical library.

17

## 18 ***2.3. Hospital quality of care***

19 As a measure of hospital quality of care, a QI of adherence to CPGs for perioperative

1 antibiotic prophylaxis was calculated using diagnosis procedure combination (DPC)  
2 administrative claims data from the QIP. The DPC is a Japanese case-mix classification  
3 system for hospital reimbursements, and more than 1600 hospitals nationwide had adopted  
4 this system by 2016. The DPC database includes information on hospital codes, patient  
5 demographics, admission and discharge dates, admission routes, outcomes, primary and  
6 secondary diagnoses based on International Classification of Diseases (10th revision) codes,  
7 comorbidities, complications, surgeries performed, and high cost procedures [23,24]. DPC  
8 data from April 2013 to March 2014 were used as these were the most recent data available  
9 for analysis.

10 The QI of interest for this study was a composite score (range: 0 to 100) that indicated a  
11 hospital's proportion of adherence to CPGs for perioperative antibiotic prophylaxis [25], and  
12 was aggregated from the results of the following 11 surgical types: evacuation of intracranial  
13 hematoma, gastrectomy, cholecystectomy, total hip replacement, mastectomy for breast cancer,  
14 thyroid surgery, prostate cancer surgery, uterine myoma surgery, uterine cancer surgery,  
15 benign ovarian tumor surgery, and ovarian cancer surgery.

16

#### 17 **2.4. Statistical analysis**

18 We first calculated descriptive statistics for the hospitals' and respondents' baseline  
19 characteristics, which included hospital bed numbers, teaching status, number of full-time

1 physicians, number of resident physicians (representing younger physicians who may be more  
2 likely to incorporate IT into their practice), as well as respondent sex, age, and appointment.  
3 The responses to the questions on the topics of hospital policies and IT infrastructure were  
4 also summarized. The main items of interest in the questionnaire consisted of yes/no  
5 questions, and we calculated each hospital's number of positive responses within each topic.  
6 The hospitals were categorized into subgroups based on these response numbers, and the  
7 mean QI score was calculated for each subgroup.

8 Finally, we performed a chi-squared automatic interaction detection (CHAID) tree  
9 analysis to identify factors that determine hospital quality of care. The independent variables  
10 included hospital size and teaching status, hospital policies toward promoting evidence-based  
11 practice, and IT infrastructure (accessibility to the Internet and other information sources,  
12 access to paid medical evidence databases, and medical library and intranet usability within  
13 hospitals). The dependent variable was the mean QI score for perioperative antibiotic  
14 prophylaxis. The CHAID tree analysis repeatedly uses chi-square statistics to split  
15 independent variables into child nodes [26-28] to identify the relative interactions between the  
16 independent variables and the outcome variables. This method is a classification tree  
17 algorithm that is often utilized as a data mining method in fields with complex data sets, such  
18 as marketing, health care [27], and nursing [28].

19 Statistical computations were conducted using SPSS software, version 20.0J and Decision

1  
2  
3  
4 1 Tree (SPSS Inc, Chicago, IL).  
5  
6

7 2 **2.5. Patient and public involvement**  
8  
9

10 3 Patients or public were not involved in the design and analysis of this study.  
11  
12

13  
14 4 **3. Results**  
15

16  
17  
18 5 **3.1. Baseline characteristics, hospital policy, and IT infrastructure**  
19

20  
21 6 Among the 239 hospitals that responded the questionnaire (response rate: 57.2%), we were  
22  
23  
24 7 able to calculate and integrate the target QI data for 153 hospitals. Hospitals that had data on  
25  
26  
27 8 at least one target QI were included. The hospital selection flow diagram is presented in  
28  
29  
30 9 Figure 1. The baseline characteristics of the participant hospitals and respondents are shown  
31  
32  
33 10 in Table 1. The median number of hospital beds were 303 (range:63–1161). Approximately  
34  
35  
36 11 75% of all the hospitals were teaching hospitals, and there was a mean of approximately 21  
37  
38  
39 12 junior and senior residents in each hospital.

40  
41 13 Table 2 shows the results of the survey on hospital policies and IT infrastructure. Almost  
42  
43  
44 14 all respondents reported that their hospitals had an explicit policy to enhance IT infrastructure  
45  
46  
47 15 (94.1%). However, the provision of wireless LAN (71.9%) and access to paid medical  
48  
49  
50 16 evidence databases in English (54.9%) was limited. Further, an intranet homepage was  
51  
52  
53 17 provided only in a minority of hospitals (27.5%).

54  
55 18 Figure 2 shows the information sources freely available or specifically provided by the  
56

1 participating hospitals. There were large variations in the provision of paid medical evidence  
2 databases, and hospitals tended to subscribe to the Japanese-language database (77.1%) rather  
3 than the English-language databases (9.8–46.4%). In general, the print editions of various  
4 CPGs and medical information were provided more frequently than the electronic editions,  
5 and there were relatively few hospitals that provided CPGs in either edition (41.2% in the  
6 print edition and 15.0% in the electronic edition).

### 8 **3.2. Determinants of hospital quality of care**

9 Table 3 shows the mean QI scores for the use of perioperative antibiotics according to the  
10 various independent variables. Hospitals with a lower number of positive responses to topics  
11 about hospital policies and IT infrastructure tended to have a lower QI score. Using the  
12 CHAID analysis, we identified 3 major determinants of the QI score (Fig. 3). Hospital size  
13 and teaching status was the strongest determinant of the QI score. The subgroup of “≤500-bed  
14 non-teaching hospitals” had the lowest QI score (73.1 points, Node 2), and the other subgroup  
15 (comprising larger or teaching hospitals) was further separated into 2 groups based on the  
16 provision of access to paid medical evidence databases. The derived subgroup of “Japanese  
17 and/or English databases” was again separated into 2 groups according to (i) accessibility to  
18 the Internet, (ii) wireless LAN availability, and (iii) wired LAN availability at outpatient  
19 clinics/wards; hospitals in the subgroup that provided the highest positive responses to these 3

1 topics had the highest QI score (87.2 points, Node 6) among all nodes. In contrast, the  
2 subgroup that provided positive responses to 2 or fewer of these topics had a lower QI score  
3 (83.1 points, Node 5). The subgroup of hospitals with no IT infrastructure elements had the  
4 lowest QI score (75.1 points, Node 4) among the larger or teaching hospitals. These results  
5 indicated that the provision of access to paid medical evidence databases and accessibility to  
6 the Internet (including LAN availability) were strongly associated with hospital quality of  
7 care.

#### 9 **4. Discussion**

10 In this multicenter study, we observed wide variations in the provision of IT infrastructure  
11 across hospitals in Japan. Our results indicated that hospitals with superior IT infrastructure  
12 tended to have higher adherence to CPGs for perioperative antibiotic prophylaxis. Using a  
13 CHAID tree analysis, we found that the provision of access to paid medical evidence  
14 databases and accessibility to the Internet (including LAN availability) were strong indicators  
15 of quality of care in larger or teaching hospitals

16 Despite the wide availability of new medical evidence, clinicians are not always able  
17 to acquire and apply the most recent and relevant information at the right moment in their  
18 daily practice. The lack of adequate IT infrastructure may affect the ability of clinicians to  
19 access this information, thereby contributing to evidence-practice gaps. There are more than

1 8,000 hospitals in Japan, of which 80% (and almost all clinics) are privately owned [29].  
2  
3  
4  
5  
6 Different leadership approaches among these hospitals may have resulted in considerable  
7  
8  
9 variations in IT infrastructure. Our analysis found that there was an overall inadequate  
10  
11  
12 provision of LAN, and accessibility to the Internet and electronic health records was limited  
13  
14  
15 among the hospitals. In addition, the print editions of various CPGs and medical information  
16  
17  
18 were provided more frequently than electronic editions. Previous studies on the activities to  
19  
20  
21 improve accessibility to medical information within specific hospital networks [30,31] have  
22  
23  
24 indicated the importance of hospital leadership in the development of IT infrastructure.

25  
26 Our CHAID analysis found that the 3 most important determinants of hospital quality  
27  
28  
29 of care were hospital size and teaching status, access to paid medical evidence databases, and  
30  
31  
32 high accessibility to the Internet. Notably, hospital policies and library/intranet usability were  
33  
34  
35 not identified as major determinants of healthcare quality. The identification of these 3 factors  
36  
37  
38 may be explained by the following reasons. Firstly, from an economic perspective, teaching  
39  
40  
41 hospitals are tended to be large and more likely to have the economic capability to provide  
42  
43  
44 resources such as IT infrastructure and full-time librarians engaged to work on intranet  
45  
46  
47 development. The results in Table 2 indicate that more than half of the participating hospitals  
48  
49  
50 do not hire full-time medical librarians. Interviews with the administrators of several leading  
51  
52  
53 teaching hospitals prior to the survey revealed that some administrators were actively working  
54  
55  
56 to enhance their hospital's intranet environment. This included the hiring of full-time  
57  
58  
59  
60



1 librarians to create user-friendly intranet homepages designed to guide clinicians to the most  
2 recent and relevant clinical information. Our results are consistent with those of previous  
3 reports that improvements in medical library functionality can improve patient health  
4 outcomes while reducing the time needed for clinicians to search for required information  
5 [32,33].

6 Secondly, we found that hospital administrators tended to provide access to free  
7 medical databases first, followed by the paid Japanese database, and finally the paid databases  
8 in English (Fig. 2). Besides the high cost of subscribing to English-language databases, the  
9 administrators may have prioritized the Japanese database due to the possible language barrier  
10 for Japanese clinicians; this phenomenon has also been observed in Taiwan [34]. However,  
11 the failure to provide medical databases in English raises concerns that the clinicians may be  
12 unable to retrieve the newest relevant information in a timely manner, which can directly  
13 impact daily clinical practice. In addition, the availability of information in English may be  
14 crucial to the efficient dissemination and effective implementation of CPGs.

15 Thirdly, the importance of Internet accessibility (including LAN availability) to  
16 healthcare quality has been similarly observed in previous studies [1,21,30]. Our study sample  
17 comprised a fairly high proportion of hospitals without wireless LAN (28.1%) or with limited  
18 wired LAN availability at outpatient clinics and wards (64.1%). In order to encourage the  
19 implementation of IT infrastructure that facilitates easy retrieval of evidence in all types of

1 hospitals, it may be necessary to develop a standardized assessment tool for hospital IT  
2 infrastructure and to include such assessments as a component of hospital accreditation.

3           In daily clinical practice, clinicians have limited time to search for and retrieve  
4 medical information. Thus, an ideal search platform would allow the use of clinical questions  
5 with several keywords and provide the requested information promptly and accurately. In  
6 addition to improving the accessibility and usability of online information, it may be useful to  
7 actively provide paid medical evidence databases (especially English-language databases) at  
8 the hospital level to supply multiple layers of information ranging from abstracts to full-text  
9 articles, as well as recommendations for CPGs and their evidence sources. In order to  
10 maximize the use of this system, individual physicians should work to improve not only their  
11 English language skills, but also their information searching skills and ability to implement  
12 new knowledge into practice.

13           Our findings suggest that larger or teaching hospitals would have the most potential for  
14 improvements in IT infrastructure that can lead to better quality of care (see Nodes 4, 5, and 6  
15 in Fig. 3). As Doebbeling et al. noted, IT implementation is dependent on the support of  
16 hospital management and “should be tailored to the needs of the organization, and not as a  
17 ‘one size fits all’ solution” [35]. It is also necessary to conduct balanced assessments of the  
18 costs and effectiveness of these IT infrastructures in order to efficiently support the  
19 implementation of evidence into practice under limited budgets.

1  
2  
3  
4 1  
5  
6 2 There are several limitations in this study. First, respondents were hospital administrators,  
7  
8  
9 3 and the results may not indicate the usability of various IT infrastructure elements from the  
10  
11  
12 4 physicians' perspective. Because individual physicians are the primary target users and are  
13  
14  
15 5 likely to be the link between IT infrastructure and quality of care, further studies are required  
16  
17  
18 6 to clarify the quality improvement mechanism in greater detail. Second, this survey was  
19  
20  
21 7 performed in Japan, which may limit the generalizability of our results to other countries.  
22  
23  
24 8 Third, the QI that we used was limited to adherence to the CPGs for perioperative antibiotic  
25  
26  
27 9 use, and therefore describes only one aspect of healthcare quality. Finally, we were not able to  
28  
29  
30 10 identify the amount of investment or affordability of each hospital's IT infrastructure, and  
31  
32  
33 11 further studies are needed to examine the total effect of these issues on the quality of hospital  
34  
35  
36 12 care.  
37  
38  
39  
40  
41  
42  
43  
44  
45  
46  
47  
48  
49  
50  
51  
52  
53  
54  
55  
56  
57  
58  
59  
60

## 14 **5. Conclusions**

15 Hospitals with superior IT infrastructure may provide high-quality care. The provision of  
16  
17  
18  
19  
20  
21  
22  
23  
24  
25  
26  
27  
28  
29  
30  
31  
32  
33  
34  
35  
36  
37  
38  
39  
40  
41  
42  
43  
44  
45  
46  
47  
48  
49  
50  
51  
52  
53  
54  
55  
56  
57  
58  
59  
60

16 access to paid medical evidence databases and accessibility to the Internet were strongly  
17 associated with hospital quality of care, and may be key factors for improving healthcare  
18 quality in larger or teaching hospitals. These infrastructure elements may allow healthcare  
19 professionals to retrieve the latest information on evidence-based medicine with greater ease

1 and facilitate the dissemination of CPGs in the Internet era. Hospitals should focus on  
2 establishing adequate IT infrastructure to support the effective implementation of CPGs. The  
3 systematic improvement of IT infrastructure in hospitals may support greater adherence to  
4 CPGs and narrow the evidence-practice gaps.

### 5 **Acknowledgements**

6 We are grateful to all hospital administrators in the QIP hospitals who participated in this  
7 questionnaire survey. Furthermore, we sincerely appreciate the interviewees of several leading  
8 teaching hospitals for their time and assistance. Finally, we thank all staff at the Department  
9 of EBM and Guidelines, Japan Council for Quality Health Care who were involved in the  
10 Minds-QIP project.

### 11 **Contributors**

12 NS and YI had full access to all the data in the study and take responsibility for the analysis  
13 and interpretation. Conception and design: NS, YI; Acquisition of data and analysis: NS, YI;  
14 Interpretation of data: NS, NY, AO, MY, HS, YI; Drafting of the manuscript and statistical  
15 analysis: NS, YI; Obtaining funding: NY, YI. All the authors (NS, NY, AO, MY, HS, and YI)  
16 were involved in critical revisions and approved the final manuscript for publication.

### 17 **Funding**

18 This research was financially supported by the Ministry of Health, Labour and Welfare of  
19 Japan and Japan Council for Quality Health Care.

1  
2  
3  
4 **1 Competing interests**

5  
6  
7 2 The authors declare that they have no competing interests.

8  
9 **3 Ethics approval**

10  
11  
12 4 This study was approved by both the Ethics Committee of Kyoto University Graduate School  
13  
14  
15 5 and Faculty of Medicine, Japan (R0979, R0135) and that of Japan Council for Quality Health  
16  
17  
18 6 Care (Rin26-4).

19  
20  
21 **7 Provenance and peer review**

22  
23  
24 8 Not commissioned; externally peer reviewed.

25  
26 **9 Data sharing statement**

27  
28  
29 10 No additional data are available.

30  
31  
32  
33 **11 REFERENCES**

- 34  
35  
36 12 [1] Gray P, Olfman L. Careers and education in information systems.. In:Bates MJ,  
37  
38  
39 13 editor.Understanding information retrieval systems:management, types and standards.Boca  
40  
41  
42 14 Raton: CRC Press; 2011. p. 91-110.
- 43  
44  
45 15 [2] van der Weijden T, Pieterse AH, Koelewijn-van Loon MS, Knaapen L, Légaré F, Boivin A,  
46  
47  
48 16 et al. How can clinical practice guidelines be adapted to facilitate shared decision making? A  
49  
50  
51 17 qualitative key-informant study. *BMJ Qual Saf.* 2013;22:855-63
- 52  
53  
54 18 [3] Légaré F, Witteman HO. Shared decision making: examining key elements and barriers to  
55  
56  
57 19 adoption into routine clinical practice. *Health Aff.* 2013;32:276-84.

- 1 [4] Blanc X, Collet TH, Auer R, Fischer R, Locatelli I, Iriarte P, et al. Publication trends of  
2 shared decision making in 15 high impact medical journals: a full-text review with  
3 bibliometric analysis. *BMC Med Inform Decis Mak.* 2014;14:71.
- 4 [5] Lang ES, Wyer PC, Haynes RB. Knowledge translation: Closing the evidence-to-practice  
5 gap. *Ann Emerg Med.* 2007;49:355-63.
- 6 [6] Institute of Medicine, Committee on quality of health care in America. *Crossing the quality  
7 chasm: a new health system for the 21<sup>st</sup> century.* Washington, DC: National Academy  
8 Press ;2001.
- 9 [7] Grimshaw JM, Thomas RE, MacLennan G, Fraser C, Ramsay CR, Vale L, et al.  
10 Effectiveness and efficiency of guideline dissemination and implementation strategies. *Health  
11 Technol Assess.* 2004;8:1-72.
- 12 [8] McGlynn EA, Asch SM, Adams J, Keesey J, Hicks J, DeCristofaro A, et al. The quality of  
13 health care delivered to adults in the United States. *N Engl J Med.* 2003;26:79-89.
- 14 [9] Gagliardi AR, Brouwers MC. Do guidelines offer implementation advice to target users? A  
15 systematic review of guideline applicability. *BMJ Open.* 2015;5:e007047. doi:  
16 10.1136/bmjopen-2014-007047.
- 17 [10] Ubbink DT, Vermeulen H, Knops AM, Legemate DA, Oude Rengerink K, Heineman MJ,  
18 et al. Implementation of evidence-based practice: outside the box, throughout the hospital.  
19 *Neth J Med.* 2011;69:87-94.

- 1  
2  
3  
4 1 [11] Gagliardi AR, Brouwers MC, Palda VA, Lemieux-Charles L, Grimshaw JM. How can we  
5  
6 2 improve guideline use? A conceptual framework of implementability. *Implement Sci.*  
7  
8  
9 3 2011;6:26.  
10  
11  
12 4 [12] Grimshaw J, Eccles M, Tetroe J. Implementing clinical guidelines: current evidence and  
13  
14  
15 5 future implications. *J Contin Educ Health Prof.* 2004;24 Suppl 1:S31-7. Review.  
16  
17  
18 6 [13] Cochrane LJ, Olson CA, Murray S, Dupuis M, Tooman T, Hayes S. Gaps between  
19  
20  
21 7 knowing and doing: understanding and assessing the barriers to optimal health care. *J Contin*  
22  
23  
24 8 *Educ Health Prof.* 2007;27:94-102.  
25  
26  
27 9 [14] Cabana MD, Rand CS, Powe NR, Wu AW, Wilson MH, Abboud PA, et al. Why don't  
28  
29 10 physicians follow clinical practice guidelines? A framework for improvement.  
30  
31  
32 11 *JAMA.*1999;28:1458-65. Review.  
33  
34  
35 12 [15] Barth JH, Misra S, Aakre KM, Langlois MR, Watine J, Twomey PJ, et al. Why are  
36  
37  
38 13 clinical practice guidelines not followed? *Clin Chem Lab Med.*2016;54:1133-39.  
39  
40  
41 14 [16] Taba P, Rosenthal M, Habicht J, Tarien H, Mathiesen M, Hill S, et al. Barriers and  
42  
43  
44 15 facilitators to the implementation of clinical practice guidelines: a cross-sectional survey  
45  
46  
47 16 among physicians in Estonia. *BMC Health Serv Res.*2012;12:455  
48  
49  
50 17 [17] Lyons SS, Tripp-Reimer T, Sorofman BA, Dewitt JE, Bootsmiller BJ, Vaughn TE, et al.  
51  
52 18 VA QUERI informatics paper: information technology for clinical guideline implementation:  
53  
54  
55 19 perceptions of multidisciplinary stakeholders. *J Am Med Inform Assoc.* 2005;12:64-71.  
56  
57  
58  
59  
60

- 1 [18] De Vos M, Graafmans W, Kooistra M, Meijboom B, Van Der Voort P, Westert G. Using  
2 quality indicators to improve hospital care: a review of the literature. *Int J Qual Health*  
3 *Care*.2009;21;11.
- 4 [19] Jones SS, Rudin RS, Perry T, Shekelle PG. Health information technology: an updated  
5 systematic review with a focus on meaningful use. *Ann Intern Med*. 2014;160: 48–54.
- 6 [20] Chaudhry B, Wang J, Wu S, Maglione M, Mojica W, Roth E, et al. Systematic review:  
7 impact of health information technology on quality, efficiency, and costs of medical care. *Ann*  
8 *Intern Med*. 2006;144: 742–52.
- 9 [21] Menachemi N, Chukmaitov A, Saunders C, Brooks RG. Hospital quality of care: does  
10 information technology matter? The relationship between information technology adoption  
11 and quality of care. *Health Care Manage Rev*. 2008;33: 51–9.
- 12 [22] Medical Information Network Distribution Service (Minds).  
13 <http://minds.jcqhc.or.jp/english/english.php> (accessed 7 June 2018).
- 14 [23] Sasaki N, Lee J, Park S, Umegaki T, Kunisawa S, Otsubo T, et al. Development and  
15 validation of an acute heart failure-specific mortality predictive model based on  
16 administrative data. *Can J Cardiol*. 2013;29: 1055–61.
- 17 [24] Hamada H, Sekimoto M, Imanaka Y. Effects of the per diem prospective payment system  
18 with DRG-like grouping system (DPC/PDPS) on resource usage and healthcare quality in  
19 Japan. *Health Policy*. 2012;107:194-201.



- 1 [25] Japanese Association for Infectious Diseases, Japanese Society of Chemotherapy,ed.  
2 Guidelines for antibiotic use. Tokyo; Kyowa Kikaku.2005-2010.[Only in Japanese]  
3  
4 [26] Kass, GV. An exploratory technique for investigating large quantities of categorical data.  
5  
6 Journal of Applied Statistics.1980;29, 119-127.  
7  
8 [27] Huang YH, Wu CY, Lin KC, Hsieh YW, Snow WM, Wang TN. Determinants of change  
9  
10 in stroke-specific quality of life after distributed constraint-induced therapy. Am J Occup Ther.  
11  
12 2013;67,54-63.  
13  
14 [28] Dudley WN, Dilorio C, Soet J. Detecting and explicating interactions in categorical data.  
15  
16 Nurs Res. 2000;49,53-6.  
17  
18 [29] Maeda A, Araujo E, Cashin C, Harris J, Ikegami N, Reich MR. Universal Health  
19  
20 Coverage for Inclusive and Sustainable Development:A Synthesis of 11 Country Case  
21  
22 Studies.Washington, DC; The World Bank.2014  
23  
24 [30] Séror AC. Internet infrastructures and health care systems: a qualitative comparative  
25  
26 analysis on networks and markets in the British National Health Service and Kaiser  
27  
28 Permanente. J Med Internet Res. 2002;4,E21.  
29  
30 [31] Peter J, Peredy G. The Permanente knowledge connection: A national  
31  
32 strategy for clinician use of web technology. Report of the web integration council -clinical  
33  
34 subcommittee. The Permanente Journal. 1998;2,69-75.  
35  
36 [32] King DN. The contribution of hospital library information services to clinical care: a

1 study in eight hospitals. Bull Med Libr Assoc. 1987;75,291-301.

2 [33] Weightman AL, Williamson J; Library & Knowledge Development Network (LKDN)

3 Quality and Statistics Group. The value and impact of information provided through library

4 services for patient care: a systematic review. Health Info Libr J. 2005,22,4-25.

5 [34] Chiu YW, Weng YH, Lo HL, Shih YH, Hsu CC, Kuo KN. Comparison of accessing

6 online databases between physicians and nurses in Taiwan. Inform Health Soc Care

7 2012;37:230-41.

8 [35] Doebbeling BN, Chou AF, Tierney WM. Priorities and strategies for the implementation

9 of integrated informatics and communications technology to improve evidence-based practice.

10 J Gen Intern Med. 2006;21:S50-7.

11

1  
2  
3  
4 **1 Figure legends**  
5

6  
7 2 Figure 1. Flow diagram of the subject hospital selection process.  
8

9  
10 3 Figure 2. Information sources freely available or specifically provided by the participating  
11  
12 4 hospitals (153 hospitals).  
13

14  
15 5 Figure 3. Chi-squared automatic interaction detection tree diagram showing the determinants  
16  
17 6 of the QI score.  
18

19  
20 7 \* These values indicate the numbers of positive responses to topics regarding (i) Electronic  
21  
22 8 health records and Internet availability, (ii) wireless LAN availability, and (iii) wired LAN  
23  
24 9 availability at outpatient clinics/wards. DB, database; LAN, local area network; QI, quality  
25  
26 10 indicator; SD, standard deviation.  
27  
28  
29  
30  
31  
32  
33  
34  
35  
36  
37  
38  
39  
40  
41  
42  
43  
44  
45  
46  
47  
48  
49  
50  
51  
52  
53  
54  
55  
56  
57  
58  
59  
60

1

Table 1. Characteristics of the hospitals and respondents<sup>a</sup> (153 hospitals)

| Hospital characteristics              |                          |
|---------------------------------------|--------------------------|
| Beds, mean±SD (range); median         | 339 ± 182 (63-1161); 303 |
| Teaching hospitals, n (%)             | 115 (75.2)               |
| Full-time physicians, mean±SD (range) | 61.9±43.3 (8-268)        |
| Resident physicians, mean±SD (range)  | 21.2±29.2 (0-197)        |
| Respondent characteristics            |                          |
|                                       | n (%)                    |
| Sex                                   |                          |
| Male                                  | 125 (81.7)               |
| Female                                | 19 (12.4)                |
| No response                           | 9 (5.9)                  |
| Age                                   |                          |
| 20–29 years                           | 5 (3.3)                  |
| 30–39 years                           | 21 (13.7)                |
| 40–49 years                           | 28 (18.3)                |
| 50–59 years                           | 50 (32.7)                |
| 60–69 years                           | 39 (25.5)                |
| No response                           | 10 (6.5)                 |
| Appointment                           |                          |
| Hospital administrator (physician)    | 69 (45.1)                |
| Chief general manager (non-physician) | 38 (24.8)                |
| Others                                | 34 (22.2)                |
| No response                           | 12 (7.8)                 |

<sup>a</sup> Respondents answered the questions as representatives of their hospital.  
SD, standard deviation.

2

3

1

Table 2. Hospital policies and IT infrastructure (153 hospitals)

| Questionnaire topics                                                                               | n (%)      |
|----------------------------------------------------------------------------------------------------|------------|
| Hospital policies                                                                                  |            |
| Explicit policy to enhance IT infrastructure to improve accessibility to medical information (YES) | 144 (94.1) |
| Explicit recommendation for the utilization of evidence-based medicine (YES)                       | 88 (57.5)  |
| Explicit recommendation for adherence to clinical practice guidelines (YES)                        | 84 (54.9)  |
| Accessibility to the Internet and other information sources                                        |            |
| Electronic health records and Internet access                                                      |            |
| Access to both electronic health records and the Internet                                          | 110 (71.9) |
| Others                                                                                             | 43 (28.1)  |
| Wireless LAN                                                                                       |            |
| Available with no limitations/with limited access points                                           | 110 (71.9) |
| Not available                                                                                      | 43 (28.1)  |
| Major locations with wired LAN access ( <i>Multiple answers allowed</i> )                          |            |
| Outpatient clinics/wards                                                                           | 98 (64.1)  |
| Other locations (including medical offices and library)                                            | 144 (94.1) |
| Access to paid medical evidence databases ( <i>Multiple answers allowed</i> )                      |            |
| Igaku Chuo Zasshi (ICHUSHI) Database <in Japanese>                                                 | 118 (77.1) |
| Medical databases such as UpToDate®, Clinical Key®, Ovid®, and DynaMed®                            | 84 (54.9)  |
| Medical library and intranet usability within the hospital                                         |            |
| Provision of an intranet homepage with user-friendly interface                                     | 42 (27.5)  |
| Number of full-time medical librarians                                                             |            |
| ≥1                                                                                                 | 66 (43.1)  |
| 0                                                                                                  | 87 (56.9)  |
| Medical library activities ( <i>Multiple answers allowed</i> )                                     |            |
| Periodic meetings held to improve the information retrieval environment                            | 84 (54.9)  |
| Continuously working to improve library services and usability                                     | 60 (39.2)  |
| Participation in hospital librarian associations and communication with other hospital librarians  | 25 (16.3)  |
| Others                                                                                             | 23 (15.0)  |

2 IT, information technology, LAN, local area network.

3

4

1

Table 3. QI scores of hospital groups according to the number of positive responses to topics on hospital policies, IT infrastructure, and hospital size (153 hospitals)

| Number of topics with positive responses                                 | Mean QI score | n  |
|--------------------------------------------------------------------------|---------------|----|
| Hospital policies <sup>a</sup>                                           |               |    |
| 0                                                                        | 78.73         | 4  |
| 1                                                                        | 81.92         | 51 |
| 2                                                                        | 84.95         | 29 |
| 3                                                                        | 78.92         | 69 |
| IT infrastructure                                                        |               |    |
| Accessibility to the Internet and other information sources <sup>b</sup> |               |    |
| 0                                                                        | 78.59         | 5  |
| 1                                                                        | 82.20         | 32 |
| 2                                                                        | 78.70         | 62 |
| 3                                                                        | 83.32         | 54 |
| Access to paid medical evidence databases <sup>c</sup>                   |               |    |
| 0                                                                        | 72.55         | 25 |
| 1                                                                        | 79.76         | 54 |
| 2                                                                        | 84.88         | 74 |
| Medical library and intranet usability within the hospital <sup>d</sup>  |               |    |
| 0                                                                        | 81.70         | 21 |
| 1                                                                        | 78.45         | 45 |
| 2                                                                        | 80.25         | 39 |
| 3                                                                        | 84.40         | 26 |
| 4-6                                                                      | 83.27         | 22 |
| Hospital size and teaching status                                        |               |    |
| >500-bed non-teaching                                                    | 87.64         | 4  |
| >500-bed teaching                                                        | 83.28         | 21 |
| ≤500-bed teaching                                                        | 83.16         | 94 |
| ≤500-bed non-teaching                                                    | 73.10         | 34 |

Questionnaire topics are as follows:

<sup>a</sup> Three topics: having explicit policy to enhance IT infrastructure, explicit recommendation for the utilization of evidence-based medicine, and explicit recommendation to use clinical practice guidelines.

<sup>b</sup> Three topics: Electronic health records and Internet availability, wireless LAN availability, wired LAN availability at outpatient clinics/wards.

<sup>c</sup> Two topics: provision of access to the Japanese medical database and access to English-language medical databases.

<sup>d</sup> Six topics: provision of access to an intranet homepage, one or more full-time medical librarians, periodic meetings for library improvement, continuously working to improve library services and usability, communication with other hospital librarians, and others.

IT, information technology; LAN, local area network; QI, quality indicator.

2

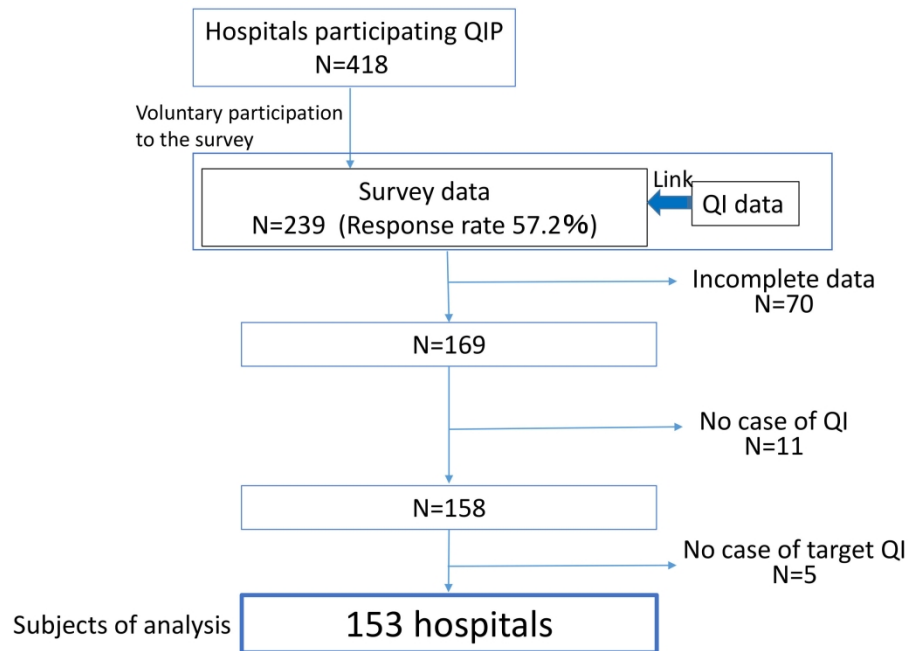

Figure 1. Flow diagram of the subject hospital selection process.

254x190mm (300 x 300 DPI)

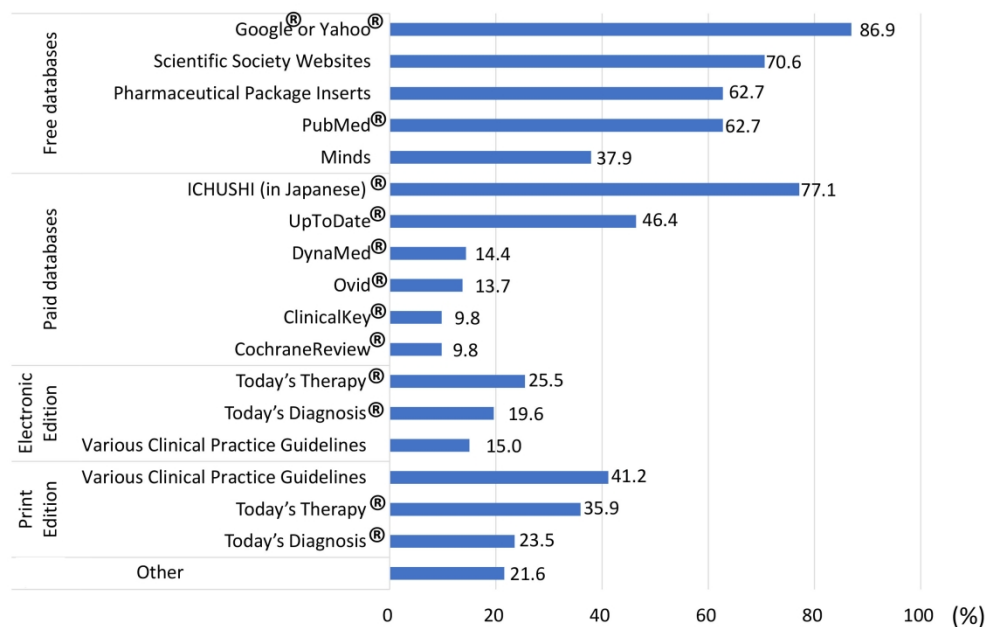

Figure 2. Information sources freely available or specifically provided by the participating hospitals (153 hospitals).

245x158mm (300 x 300 DPI)



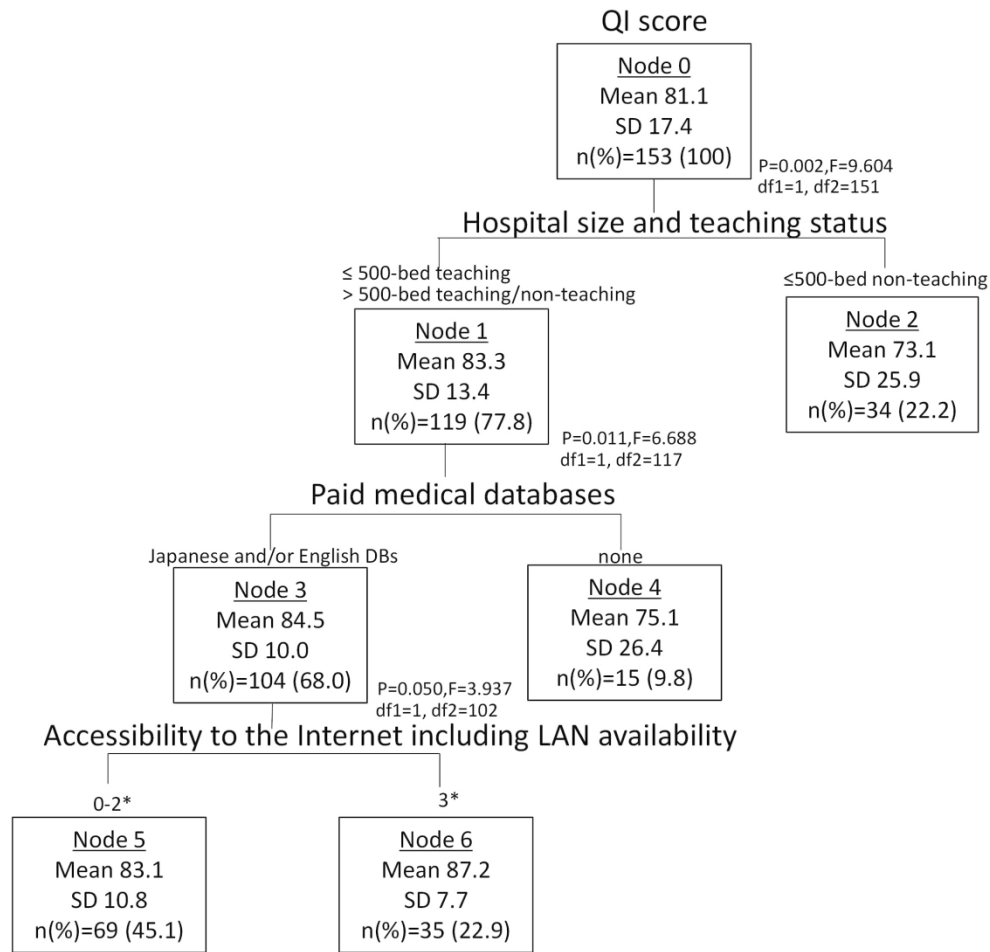

Figure 3. Chi-squared automatic interaction detection tree diagram showing the determinants of the QI score.

\* These values indicate the numbers of positive responses to topics regarding (i) Electronic health records and Internet availability, (ii) wireless LAN availability, and (iii) wired LAN availability at outpatient clinics/wards. DB, database; LAN, local area network; QI, quality indicator; SD, standard deviation.

196x188mm (300 x 300 DPI)

**STROBE 2007 (v4) Statement—Checklist of items that should be included in reports of *cross-sectional studies***

| Section/Topic                | Item # | Recommendation                                                                                                                                                                       | Reported on page # |
|------------------------------|--------|--------------------------------------------------------------------------------------------------------------------------------------------------------------------------------------|--------------------|
| <b>Title and abstract</b>    | 1      | (a) Indicate the study's design with a commonly used term in the title or the abstract                                                                                               | 1                  |
|                              |        | (b) Provide in the abstract an informative and balanced summary of what was done and what was found                                                                                  | 2-3                |
| <b>Introduction</b>          |        |                                                                                                                                                                                      |                    |
| Background/rationale         | 2      | Explain the scientific background and rationale for the investigation being reported                                                                                                 | 2, 5-6             |
| Objectives                   | 3      | State specific objectives, including any prespecified hypotheses                                                                                                                     | 2,6                |
| <b>Methods</b>               |        |                                                                                                                                                                                      |                    |
| Study design                 | 4      | Present key elements of study design early in the paper                                                                                                                              | 2,7-8              |
| Setting                      | 5      | Describe the setting, locations, and relevant dates, including periods of recruitment, exposure, follow-up, and data collection                                                      | 2,7-10             |
| Participants                 | 6      | (a) Give the eligibility criteria, and the sources and methods of selection of participants                                                                                          | 7-8                |
| Variables                    | 7      | Clearly define all outcomes, exposures, predictors, potential confounders, and effect modifiers. Give diagnostic criteria, if applicable                                             | 7-10               |
| Data sources/<br>measurement | 8*     | For each variable of interest, give sources of data and details of methods of assessment (measurement). Describe comparability of assessment methods if there is more than one group | 7-10               |
| Bias                         | 9      | Describe any efforts to address potential sources of bias                                                                                                                            | 17                 |
| Study size                   | 10     | Explain how the study size was arrived at                                                                                                                                            | 7-11               |
| Quantitative variables       | 11     | Explain how quantitative variables were handled in the analyses. If applicable, describe which groupings were chosen and why                                                         | 7-10、 Table3       |
| Statistical methods          | 12     | (a) Describe all statistical methods, including those used to control for confounding                                                                                                | 9-11               |
|                              |        | (b) Describe any methods used to examine subgroups and interactions                                                                                                                  | 9-11               |
|                              |        | (c) Explain how missing data were addressed                                                                                                                                          | Fig1.              |
|                              |        | (d) If applicable, describe analytical methods taking account of sampling strategy                                                                                                   | *                  |
|                              |        | (e) Describe any sensitivity analyses                                                                                                                                                | *                  |
| <b>Results</b>               |        |                                                                                                                                                                                      |                    |

|                          |     |                                                                                                                                                                                                              |                          |
|--------------------------|-----|--------------------------------------------------------------------------------------------------------------------------------------------------------------------------------------------------------------|--------------------------|
| Participants             | 13* | (a) Report numbers of individuals at each stage of study—eg numbers potentially eligible, examined for eligibility, confirmed eligible, included in the study, completing follow-up, and analysed            | 11, Fig1.                |
|                          |     | (b) Give reasons for non-participation at each stage                                                                                                                                                         | *                        |
|                          |     | (c) Consider use of a flow diagram                                                                                                                                                                           | 11, Fig1.                |
| Descriptive data         | 14* | (a) Give characteristics of study participants (eg demographic, clinical, social) and information on exposures and potential confounders                                                                     | 11, Table 1.             |
|                          |     | (b) Indicate number of participants with missing data for each variable of interest                                                                                                                          | Fig1.                    |
| Outcome data             | 15* | Report numbers of outcome events or summary measures                                                                                                                                                         | Table 3. Figure 2.       |
| Main results             | 16  | (a) Give unadjusted estimates and, if applicable, confounder-adjusted estimates and their precision (eg, 95% confidence interval). Make clear which confounders were adjusted for and why they were included | 11-13, Table 2.          |
|                          |     | (b) Report category boundaries when continuous variables were categorized                                                                                                                                    | 11-13, Table 3           |
|                          |     | (c) If relevant, consider translating estimates of relative risk into absolute risk for a meaningful time period                                                                                             | *                        |
| Other analyses           | 17  | Report other analyses done—eg analyses of subgroups and interactions, and sensitivity analyses                                                                                                               | 11-13, Table 3 Figure 3. |
| <b>Discussion</b>        |     |                                                                                                                                                                                                              |                          |
| Key results              | 18  | Summarise key results with reference to study objectives                                                                                                                                                     | 2-4,13,17-18             |
| Limitations              | 19  | Discuss limitations of the study, taking into account sources of potential bias or imprecision. Discuss both direction and magnitude of any potential bias                                                   | 4, 17                    |
| Interpretation           | 20  | Give a cautious overall interpretation of results considering objectives, limitations, multiplicity of analyses, results from similar studies, and other relevant evidence                                   | 4,13-16                  |
| Generalisability         | 21  | Discuss the generalisability (external validity) of the study results                                                                                                                                        | 4,17                     |
| <b>Other information</b> |     |                                                                                                                                                                                                              |                          |
| Funding                  | 22  | Give the source of funding and the role of the funders for the present study and, if applicable, for the original study on which the present article is based                                                | 18                       |

\*Give information separately for cases and controls in case-control studies and, if applicable, for exposed and unexposed groups in cohort and cross-sectional studies.

**Note:** An Explanation and Elaboration article discusses each checklist item and gives methodological background and published examples of transparent reporting. The STROBE checklist is best used in conjunction with this article (freely available on the Web sites of PLoS Medicine at <http://www.plosmedicine.org/>, Annals of Internal Medicine at <http://www.annals.org/>, and Epidemiology at <http://www.epidem.com/>). Information on the STROBE Initiative is available at [www.strobe-statement.org](http://www.strobe-statement.org).

# BMJ Open

## Does Hospital Information Technology Infrastructure Promote the Implementation of Clinical Practice Guidelines? A Multicenter Observational Study of Japanese Hospitals

|                                 |                                                                                                                                                                                                                                                                                                                                                                                                                                                                                                                                                            |
|---------------------------------|------------------------------------------------------------------------------------------------------------------------------------------------------------------------------------------------------------------------------------------------------------------------------------------------------------------------------------------------------------------------------------------------------------------------------------------------------------------------------------------------------------------------------------------------------------|
| Journal:                        | <i>BMJ Open</i>                                                                                                                                                                                                                                                                                                                                                                                                                                                                                                                                            |
| Manuscript ID                   | bmjopen-2018-024700.R1                                                                                                                                                                                                                                                                                                                                                                                                                                                                                                                                     |
| Article Type:                   | Research                                                                                                                                                                                                                                                                                                                                                                                                                                                                                                                                                   |
| Date Submitted by the Author:   | 25-Feb-2019                                                                                                                                                                                                                                                                                                                                                                                                                                                                                                                                                |
| Complete List of Authors:       | Sasaki, Noriko; Kyoto University Graduate School of Medicine, Department of Healthcare Economics and Quality Management<br>Yamaguchi, Naohito; Japan Council for Quality Health Care, Tokyo, Japan<br>Okumura, Akiko; Japan Council for Quality Health Care, Tokyo, Japan<br>Yoshida, Masahiro; Japan Council for Quality Health Care, Tokyo, Japan<br>Sugawara, Hiroyuki; Japan Council for Quality Health Care, Tokyo, Japan<br>Imanaka, Yuichi; Kyoto University Graduate School of Medicine, Department of Healthcare Economics and Quality Management |
| <b>Primary Subject Heading</b>: | Evidence based practice                                                                                                                                                                                                                                                                                                                                                                                                                                                                                                                                    |
| Secondary Subject Heading:      | Health informatics                                                                                                                                                                                                                                                                                                                                                                                                                                                                                                                                         |
| Keywords:                       | Clinical practice guidelines, evidence-based practice, quality indicators, healthcare quality, hospital IT infrastructure, evidence-practice gaps                                                                                                                                                                                                                                                                                                                                                                                                          |
|                                 |                                                                                                                                                                                                                                                                                                                                                                                                                                                                                                                                                            |

SCHOLARONE™  
Manuscripts

1  
2  
3  
4 1 **Does Hospital Information Technology Infrastructure Promote the Implementation of**  
5  
6  
7 2 **Clinical Practice Guidelines? A Multicenter Observational Study of Japanese Hospitals**  
8  
9

10 3  
11  
12  
13 4 Noriko Sasaki, MD, PhD,<sup>1</sup> Naohito Yamaguchi, MD, PhD,<sup>2</sup> Akiko Okumura, MPH,<sup>2</sup>  
14

15  
16 5 Masahiro Yoshida, MD, PhD,<sup>2</sup> Hiroyuki Sugawara, MMS,<sup>2</sup> and Yuichi Imanaka, MD, PhD<sup>1,2</sup>  
17

18  
19 6 <sup>1</sup>Department of Healthcare Economics and Quality Management,  
20

21  
22 7 Kyoto University Graduate School of Medicine, Kyoto, Japan  
23

24  
25 8 <sup>2</sup> Japan Council for Quality Health Care, Tokyo, Japan  
26

27  
28 9  
29  
30  
31 10  
32

33  
34 11  
35

36  
37 12  
38

39  
40 13 Correspondence to: Professor Yuichi Imanaka; [imanaka-y@umin.net](mailto:imanaka-y@umin.net)  
41  
42  
43  
44  
45  
46  
47  
48  
49  
50  
51  
52  
53  
54  
55  
56  
57  
58  
59  
60

1  
2  
3  
4 **1 Abstract**

5  
6  
7 **2 Objectives:** It remains unclear whether insufficient information technology (IT) infrastructure  
8  
9  
10  
11  
12  
13  
14  
15  
16  
17  
18  
19  
20  
21  
22  
23  
24  
25  
26  
27  
28  
29  
30  
31  
32  
33  
34  
35  
36  
37  
38  
39  
40  
41  
42  
43  
44  
45  
46  
47  
48  
49  
50  
51  
52  
53  
54  
55  
56  
57  
58  
59  
60  
**3** in hospitals hinders implementation of clinical practice guidelines (CPGs) and affects health  
**4** care quality. The objectives of this study were to describe the present state of IT infrastructure  
**5** provided in acute care hospitals across Japan and to investigate its association with healthcare  
**6** quality.

**7 Methods:** A questionnaire survey of hospital administrators was conducted in 2015 to gather  
**8** information on hospital-level policies and elements of IT infrastructure. The number of  
**9** positive responses by each respondent to the survey items was tallied. Next, a composite  
**10** quality indicator score of hospital adherence to CPGs for perioperative antibiotic prophylaxis  
**11** was calculated using secondary administrative data. Based on this quality indicator score, we  
**12** performed a chi-squared automatic interaction detection (CHAID) analysis to identify  
**13** correlates of hospital healthcare quality. The independent variables included hospital size and  
**14** teaching status in addition to hospital policies and elements of IT infrastructure.

**15 Results:** Wide variations were observed in the availability of various IT infrastructure  
**16** elements across hospitals, especially in local area network availability and access to paid  
**17** evidence databases. The CHAID analysis showed that hospitals with a high level of access to  
**18** paid databases ( $p<0.05$ ) and Internet ( $p<0.05$ ) were strongly associated with increased care  
**19** quality in larger or teaching hospitals.

1  
2  
3  
4 1 **Conclusions:** Hospitals with superior IT infrastructure may provide higher-quality care. This  
5  
6  
7 2 allows clinicians to easily access the latest information on evidence-based medicine and  
8  
9  
10 3 facilitate the dissemination of CPGs. The systematic improvement of hospital IT  
11  
12  
13 4 infrastructure may promote CPG use and narrow the evidence-practice gaps.  
14  
15  
16 5 **Key words:** Clinical practice guidelines; evidence-based practice; quality indicators;  
17  
18  
19 6 healthcare quality; hospital IT infrastructure; evidence-practice gaps.  
20  
21  
22  
23  
24  
25  
26  
27  
28  
29  
30  
31  
32  
33  
34  
35  
36  
37  
38  
39  
40  
41  
42  
43  
44  
45  
46  
47  
48  
49  
50  
51  
52  
53  
54  
55  
56  
57  
58  
59  
60

## 1 **Strengths and limitations of this study**

- 2 ● In this multicenter study, we observed wide variations in the provision of IT  
3 infrastructure across acute care hospitals in Japan.
- 4 ● Hospitals with superior IT infrastructure tended to have higher adherence to CPGs for  
5 perioperative antibiotic prophylaxis.
- 6 ● We found that a high level of access to paid medical evidence databases and accessibility  
7 to the Internet were the key factors of care quality in acute care hospitals using the  
8 CHAID analysis.
- 9 ● We shed light on new knowledge that establishing a hospital IT infrastructure for medical  
10 information retrieval may promote greater awareness and adherence to CPGs by  
11 clinicians and narrow evidence-practice gaps.
- 12 ● The QI of adherence to CPGs for perioperative antibiotic use describe only one aspect of  
13 healthcare quality; that the survey was conducted only in Japan and may limit  
14 generalizability.



## 1. Introduction

Due to the growth of renewed medical information and frequent updates to clinical practice guidelines (CPGs) in the Internet era, clinicians can find it difficult to keep abreast of the latest evidence. The availability and usability of hospital information technology (IT) infrastructure such as wireless local area networks (LAN) and medical evidence databases may affect the ability of clinicians to update their knowledge and practice, which can influence the quality of provided care. These infrastructure elements may facilitate accessibility to various updated CPGs, which would be essential for CPG implementation in daily practice [1].

CPGs for various diseases have been developed worldwide not only to help clinicians but also to promote shared decision making with patients [2-4]. However, CPGs continue to be underused even in countries even where CPGs are well developed over the past several decades. These gaps between medical evidence and clinical practice (i.e., “evidence-practice gaps”) can lead to the provision of substandard or potentially harmful care to patients [5-11]. System-level barriers as well as individual-level barriers to evidence-based practice have been revealed in previous studies [12-17]. For example, institutional equipment, technological capital, and accessibility to guideline-related resources have been found to be important in addition to individual awareness, familiarity and agreement with the contents [15-17]. Clinical quality indicators (QIs) can monitor clinicians’ adherence to the guidelines, but they

1  
2  
3  
4 1 are not necessarily utilized to assess guideline implementation [18]. Furthermore, there is no  
5  
6  
7 2 clear evidence regarding whether hospital IT infrastructure may affect the quality of provided  
8  
9  
10 3 care using these QIs.  
11  
12

13 4 On the other hand, research related to the adoption of health information technology at the  
14  
15  
16 5 organizational level is growing, and a number of studies have reported positive effects on  
17  
18  
19 6 quality, safety and efficiency [19-21]. However, most of these studies have focused on  
20  
21  
22 7 clinical decision support systems, order entry, telecommunication systems, e-Prescriptions  
23  
24  
25 8 [19,20] and strategic management systems [21]. It thus remains unclear as to whether the lack  
26  
27  
28 9 of an adequate IT infrastructure for medical information retrieval is a crucial system-level  
29  
30  
31 10 barrier for CPG implementation. In Japan, over 180 evidence-based CPGs have been assessed  
32  
33  
34 11 and disseminated by the government-funded Medical Information Network Distribution  
35  
36  
37 12 Service (Minds) Guideline Center [22] over the last decade, but the actual use of these CPGs  
38  
39  
40 13 in daily clinical practice remains unknown.  
41  
42

43 14 This multicenter study aimed to describe the present state of IT infrastructure provided in  
44  
45  
46 15 Japanese acute care hospitals and to investigate its association with healthcare quality, taking  
47  
48  
49 16 into account hospital size, hospital policies promoting evidence-based practice.  
50  
51  
52 17  
53  
54  
55  
56  
57  
58  
59  
60

## 1 2. Methods

### 2 2.1. Data sources

3 This study employed both primary data (based on a questionnaire survey of hospital  
4 administrators) and secondary data (administrative claims data) in the analysis. Data were  
5 obtained from hospitals enrolled in the Quality Indicator/Improvement Project (QIP), which is  
6 an ongoing project launched in 1995 to monitor and improve clinical performance in acute  
7 care hospitals across Japan through the analysis of administrative claims data [23,24].  
8 Currently, over 500 QIP member hospitals voluntarily submit data for analysis, and the  
9 project generates periodic reports of clinical and economic performance. The participating  
10 hospitals vary widely in type (e.g., teaching status and hospital ownership), region of location,  
11 patient and physician volume, bed numbers, and composition of specialties.

12 The Minds-QIP project, as a part of the activities of the Minds Guideline Center, was  
13 initiated in 2014, with the objective of effectively implementing and disseminating CPGs  
14 across Japan. A survey was conducted as part of this project by mailing questionnaires to the  
15 hospital administrators (including general managers) of QIP member hospitals between  
16 January and March 2015. The questionnaire included items on hospital policies regarding  
17 evidence-based practice and hospital IT infrastructure, actual provision of IT infrastructure  
18 (including LAN deployment and usability of medical evidence databases), QI monitoring, and  
19 the use of clinical pathways. This study focused on hospital policies and IT infrastructure. The

1  
2  
3  
4 1 questionnaire was developed based on literature reviews, discussions with experts, and  
5  
6  
7 2 semi-structured face-to-face interviews with several hospital administrators and IT managers  
8  
9  
10 3 from five major teaching hospitals. Survey respondents were asked to answer questions from  
11  
12  
13 4 a concise list about their institution and policies as representatives of their hospital (Appendix  
14  
15  
16 5 Table).  
17  
18  
19 6  
20  
21  
22

## 23 7 ***2.2. Hospital policy and IT infrastructure***

24  
25  
26 8 In order to identify each hospital's policies promoting evidence-based practice, the  
27  
28  
29 9 questionnaire included items on whether the hospital has an explicit policy to enhance IT  
30  
31  
32 10 infrastructure in order to improve accessibility to medical information, whether it explicitly  
33  
34  
35 11 recommends the practice of evidence-based medicine, and whether it explicitly encourages  
36  
37  
38 12 the use of CPGs.  
39  
40

41 13 The questionnaire was also designed to focus on the following three elements of hospital  
42  
43  
44 14 IT infrastructure: (i) accessibility to the Internet and other information sources, including  
45  
46  
47 15 wired/wireless LAN availability; (ii) access to paid medical evidence databases in English and  
48  
49  
50 16 Japanese; and (iii) medical library and intranet usability, such as the availability of a  
51  
52  
53 17 well-organized intranet interface, number of full-time medical librarians, and activities for  
54  
55  
56 18 improving the medical library.  
57  
58  
59 19  
60

### 1 **2.3. Hospital quality of care**

2 As a measure of hospital quality of care, a QI of adherence to CPGs for perioperative  
3 antibiotic prophylaxis was calculated using diagnosis procedure combination (DPC)  
4 administrative claims data from the QIP. The DPC is a Japanese case-mix classification  
5 system for hospital reimbursements, and more than 1600 hospitals nationwide had adopted  
6 this system by 2016. The DPC database includes information on hospital codes, patient  
7 demographics, admission and discharge dates, admission routes, outcomes, primary and  
8 secondary diagnoses based on International Classification of Diseases (10th revision) codes,  
9 comorbidities, complications, surgeries performed, and high cost procedures [23,24]. DPC  
10 data from April 2013 to March 2014 were used as these were the most recent data available  
11 for analysis.

12 The QI of interest for this study was a composite score (range: 0 to 100) that indicated a  
13 hospital's proportion of adherence to CPGs for perioperative antibiotic prophylaxis [25], and  
14 was aggregated from the results of the following 11 surgical types (i.e., target QI in Fig.1) :  
15 evacuation of intracranial hematoma, gastrectomy, cholecystectomy, total hip replacement,  
16 mastectomy for breast cancer, thyroid surgery, prostate cancer surgery, uterine myoma  
17 surgery, uterine cancer surgery, benign ovarian tumor surgery, and ovarian cancer surgery.

18

## 1 2.4. *Statistical analysis*

2 We first calculated descriptive statistics for the hospitals' and respondents' baseline  
3 characteristics, which included hospital bed numbers, teaching status, number of full-time  
4 physicians, number of resident physicians (representing younger physicians who may be more  
5 likely to incorporate IT into their practice), as well as respondent sex, age, and appointment.  
6 The responses to the questionnaire items related to hospital policies and IT infrastructure were  
7 also summarized. The main items of interest consisted of yes/no questions; we calculated each  
8 hospital's number of positive responses within each item. The hospitals were categorized into  
9 subgroups based on these response numbers, and the mean QI score was calculated for each  
10 subgroup.

11 Finally, we performed a chi-squared automatic interaction detection (CHAID) tree  
12 analysis to identify factors that determine hospital quality of care. The independent variables  
13 included hospital size and teaching status, hospital policies regarding the promotion of  
14 evidence-based practice, and IT infrastructure (accessibility to the Internet and other  
15 information sources, access to paid medical evidence databases, and medical library and  
16 intranet usability within hospitals). The dependent variable was the mean QI score for  
17 perioperative antibiotic prophylaxis. CHAID tree analysis repeatedly uses chi-square statistics  
18 to split independent variables into child nodes [26-28] to identify the relative interactions  
19 between the independent variables and the outcome variables. This method is a classification

1  
2  
3  
4 1 tree algorithm that is often utilized as a data mining method in fields with complex data sets,  
5  
6  
7 2 such as marketing, health care [27], and nursing [28]. We used the exhaustive CHAID  
8  
9  
10 3 algorithm, a modified version of the basic algorithm that performs a more thorough merging  
11  
12  
13 4 and testing of independent variables [29]. Statistical calculations were performed using SPSS  
14  
15  
16 5 20.0J software and Decision Tree (SPSS Inc, Chicago, IL).

### 6 ***2.5. Patient and public involvement***

7 There was no patients or public involvement in the design and analysis of this study.  
8  
9  
10  
11  
12  
13  
14  
15  
16  
17  
18  
19  
20  
21  
22  
23  
24  
25  
26  
27  
28  
29

## 9 **3. Results**

### 10 ***3.1. Baseline characteristics, hospital policy, and IT infrastructure***

11 From the 239 hospitals that responded to the questionnaire (response rate: 57.2%), we were  
12 able to calculate and integrate the target QI data for 153 hospitals. Hospitals with data on at  
13 least one target QI were included. The hospital selection flow diagram is presented in Figure 1.  
14 The baseline characteristics of the participant hospitals and respondents are shown in Table 1.  
15 The median number of hospital beds was 303 (range: 63–1161). Approximately 75% of all  
16 the hospitals were teaching hospitals; the mean number of junior and senior residents in each  
17 hospital was approximately 21.

18 Table 2 shows the results of the survey on hospital policies and IT infrastructure. Almost  
19  
20  
21  
22  
23  
24  
25  
26  
27  
28  
29  
30  
31  
32  
33  
34  
35  
36  
37  
38  
39  
40  
41  
42  
43  
44  
45  
46  
47  
48  
49  
50  
51  
52  
53  
54  
55  
56  
57  
58  
59  
60

1  
2  
3  
4 1 all respondents reported that their hospitals had an explicit policy to enhance IT infrastructure  
5  
6  
7 2 (94.1%). However, the provision of wireless LAN (71.9%) and access to paid medical  
8  
9  
10 3 evidence databases in English (54.9%) was limited. Further, an intranet homepage was  
11  
12  
13 4 provided only in a minority of hospitals (27.5%).

14  
15  
16 5 Figure 2 shows the information sources freely available or specifically provided by the  
17  
18  
19 6 participating hospitals. There were large variations in the provision of paid medical evidence  
20  
21  
22 7 databases, and hospitals tended to subscribe to the Japanese-language database (77.1%) rather  
23  
24  
25 8 than the English-language databases (9.8–46.4%). In general, the print editions of various  
26  
27  
28 9 CPGs and medical information were provided more frequently than the electronic editions,  
29  
30  
31 10 and there were relatively few hospitals that provided CPGs in either edition (41.2% in the  
32  
33  
34 11 print edition and 15.0% in the electronic edition).  
35  
36  
37  
38  
39  
40

### 41 13 ***3.2. Correlates of hospital quality of care***

42  
43  
44 14 Table 3 shows the mean QI scores for the use of perioperative antibiotics according to the  
45  
46  
47 15 various independent variables. Hospitals with a lower number of positive responses to items  
48  
49  
50 16 related to hospital policies and IT infrastructure tended to have a lower QI score. Using  
51  
52  
53 17 CHAID analysis, we identified three major correlates of QI score (Fig. 3; hospital size and  
54  
55  
56 18 teaching status were the strongest correlates. The subgroup of “≤500-bed non-teaching  
57  
58  
59 19 hospitals” had the lowest QI score (73.1 points, Node 2). The other subgroup (comprising  
60



1  
2  
3  
4 1 larger or teaching hospitals) was divided into two groups based on the provision of access to  
5  
6  
7 2 paid medical evidence databases. The derived subgroup of “Japanese and/or English  
8  
9  
10 3 databases” was further divided into two groups according to (i) accessibility to the Internet,  
11  
12  
13 4 (ii) wireless LAN availability, and (iii) wired LAN availability at outpatient clinics/wards;  
14  
15  
16 5 hospitals in the subgroup that had the highest number of positive responses to these three  
17  
18  
19 6 items had the highest QI score (87.2 points, Node 6) among all nodes. In contrast, the  
20  
21  
22 7 subgroup that had positive responses to two or fewer of these items had a lower QI score  
23  
24  
25 8 (83.1 points, Node 5). The subgroup of hospitals with no IT infrastructure elements had the  
26  
27  
28 9 lowest QI score (75.1 points, Node 4) among the larger or teaching hospitals. These results  
29  
30  
31 10 indicated that the provision of access to paid medical evidence databases and accessibility to  
32  
33  
34 11 the Internet (including LAN availability) were strongly associated with hospital quality of  
35  
36  
37 12 care.  
38  
39  
40 13

#### 44 14 **4. Discussion**

45  
46  
47 15 In this multicenter study, we observed wide variations in the provision of IT infrastructure  
48  
49  
50 16 across hospitals in Japan. Our results indicated that hospitals with superior IT infrastructure  
51  
52  
53 17 tended to have higher adherence to CPGs for perioperative antibiotic prophylaxis. Using a  
54  
55  
56 18 CHAID tree analysis, we found that the provision of access to paid medical evidence  
57  
58  
59 19 databases and accessibility to the Internet (including LAN availability) were strong indicators  
60

1  
2  
3  
4 1 of quality of care in larger or teaching hospitals  
5  
6

7 2 Despite the wide availability of new medical evidence, clinicians are not always able  
8  
9  
10 3 to acquire and apply the most recent and relevant information at the right moment in their  
11  
12  
13 4 daily practice. The lack of adequate IT infrastructure may affect the ability of clinicians to  
14  
15  
16 5 access this information, thereby contributing to evidence-practice gaps. There are more than  
17  
18  
19 6 8,000 hospitals in Japan, of which 80% (and almost all clinics) are privately owned [30].  
20  
21  
22 7 Different leadership approaches among these hospitals may have resulted in considerable  
23  
24  
25 8 variations in IT infrastructure. Our analysis found that there was an overall inadequate  
26  
27  
28 9 provision of LAN, and accessibility to the Internet and electronic health records was limited  
29  
30  
31 10 among the hospitals. In addition, the print editions of various CPGs and medical information  
32  
33  
34 11 were provided more frequently than electronic editions. Previous studies on the activities to  
35  
36  
37 12 improve accessibility to medical information within specific hospital networks [31,32] have  
38  
39  
40 13 indicated the importance of hospital leadership in the development of IT infrastructure.  
41  
42

43 14 Our CHAID analysis found that the three most important correlates of hospital  
44  
45  
46 15 quality of care were hospital size and teaching status, access to paid medical evidence  
47  
48  
49 16 databases, and high accessibility to the Internet. Notably, hospital policies and library/intranet  
50  
51  
52 17 usability were not identified as major correlates. There are likely several reasons for the  
53  
54  
55 18 identification of hospital size and teaching status, access to paid medical evidence databases,  
56  
57  
58 19 and high accessibility to the Internet as the most important factors. Firstly, from an economic  
59  
60

1  
2  
3  
4 1 perspective, teaching hospitals tend to be large and more likely to have the economic  
5  
6  
7 2 capability to provide resources such as IT infrastructure and full-time librarians engaged to  
8  
9  
10 3 work on intranet development. The results in Table 2 indicate that more than half of the  
11  
12  
13 4 participating hospitals do not hire full-time medical librarians. Interviews with the  
14  
15  
16 5 administrators of several leading teaching hospitals prior to the survey revealed that some  
17  
18  
19 6 administrators were actively working to enhance their hospital's intranet environment. This  
20  
21  
22 7 included the hiring of full-time librarians to create user-friendly intranet homepages designed  
23  
24  
25 8 to guide clinicians to the most recent and relevant clinical information. Our results are  
26  
27  
28 9 consistent with those of previous reports that show improvements in medical library  
29  
30  
31 10 functionality can improve patient health outcomes while reducing the time needed for  
32  
33  
34 11 clinicians to search for required information [33,34].

37 12 Secondly, we found that hospital administrators tended to provide access to free  
38  
39  
40 13 medical databases first, followed by the paid Japanese database, and finally the paid databases  
41  
42  
43 14 in English (Fig. 2). Besides the high cost of subscribing to English-language databases, the  
44  
45  
46 15 administrators may have prioritized the Japanese database due to the possible language barrier  
47  
48  
49 16 for Japanese clinicians; this phenomenon has also been observed in Taiwan [35]. However,  
50  
51  
52 17 the failure to provide medical databases in English raises concerns that the clinicians may be  
53  
54  
55 18 unable to retrieve the newest relevant information in a timely manner, which can directly  
56  
57  
58 19 impact daily clinical practice. In addition, the availability of information in English may be

1  
2  
3  
4 1 crucial to the efficient dissemination and effective implementation of CPGs.  
5  
6

7 2 Thirdly, the importance of Internet accessibility (including LAN availability) to  
8  
9  
10 3 healthcare quality has been similarly observed in previous studies from the US and UK  
11  
12  
13 4 [1,21,31]. Our study sample included a fairly high proportion of hospitals without wireless  
14  
15  
16 5 LAN (28.1%) or with limited wired LAN availability at outpatient clinics and wards (64.1%).  
17  
18  
19 6 In order to encourage the implementation of IT infrastructure that facilitates easy retrieval of  
20  
21  
22 7 evidence in all types of hospitals, it may be necessary to develop a standardized assessment  
23  
24  
25 8 tool for hospital IT infrastructure and to include such assessments as a component of hospital  
26  
27  
28 9 accreditation.

30  
31 10 In daily clinical practice, clinicians have limited time to search for and retrieve  
32  
33  
34 11 medical information. Thus, an ideal search platform would allow the use of clinical questions  
35  
36  
37 12 with several keywords and provide the requested information promptly and accurately. In  
38  
39  
40 13 addition to improving the accessibility and usability of online information, it may be useful to  
41  
42  
43 14 actively provide paid medical evidence databases (especially English-language databases) at  
44  
45  
46 15 the hospital level to supply multiple layers of information ranging from abstracts to full-text  
47  
48  
49 16 articles, as well as recommendations for CPGs and their evidence sources. In order to  
50  
51  
52 17 maximize the use of this system, individual physicians should work to improve not only their  
53  
54  
55 18 English language skills, but also their information searching skills and ability to implement  
56  
57  
58 19 new knowledge into practice.  
59  
60

1  
2  
3  
4 1 Our findings suggest that larger or teaching hospitals would have the most potential for  
5  
6  
7 2 improvements in IT infrastructure that can lead to better quality of care (see Nodes 4, 5, and 6  
8  
9  
10 3 in Fig. 3). As Doebbeling et al. noted, IT implementation is dependent on the support of  
11  
12  
13 4 hospital management and “should be tailored to the needs of the organization, and not as a  
14  
15  
16 5 ‘one size fits all’ solution” [36]. It is also necessary to conduct balanced assessments of the  
17  
18  
19 6 costs and effectiveness of these IT infrastructures in order to efficiently support the  
20  
21  
22 7 implementation of evidence into practice under limited budgets.

23  
24  
25 8 In a broader context, barriers to implementing CPG recommendations in daily practice  
26  
27  
28 9 vary greatly at the individual level of specialists and physicians (e.g. perception, education,  
29  
30  
31 10 incentives, professional autonomy), the institutional level (e.g., physician leadership, hospital  
32  
33  
34 11 policies, finance, institutional culture, teamwork, IT infrastructure), national level (e.g.,  
35  
36  
37 12 policies to promote CPG use, hospital accreditation) and the societal level (e.g. a culture of  
38  
39  
40 13 shared-decision making with patients, information derived from mass media) [37,38,39]. Yet,  
41  
42  
43 14 given the growing importance of IT use in an innovative society, the impact of IT adoption on  
44  
45  
46 15 healthcare quality warrants far more consideration of the types of relationships that were  
47  
48  
49 16 revealed in this study. According to previous research, IT itself needs to be understood as  
50  
51  
52 17 having two distinct components—information technology and communication  
53  
54  
55 18 technology—and these differently affect the autonomy of workers [40]. Further examination  
56  
57  
58 19 is needed to clarify these issues in order to implement IT in practice settings.  
59  
60

1  
2  
3  
4 1 There are several limitations to this study. First, the respondents were hospital  
5  
6  
7 2 administrators, which means the results may not indicate the usability of various IT  
8  
9  
10 3 infrastructure elements from a physician's perspective. In addition, as this was a self-reported  
11  
12  
13 4 survey, the possible presence of social desirability bias may have caused these respondents to  
14  
15  
16 5 underestimate the barriers being investigated. Because individual physicians are the primary  
17  
18  
19 6 target users and are likely to be the link between IT infrastructure and quality of care, studies  
20  
21  
22 7 focusing physicians are required in the future to clarify the quality improvement mechanism  
23  
24  
25 8 in detail. Second, the survey was conducted in Japan, which may limit the generalizability of  
26  
27  
28 9 our results to other countries. Third, the QI that we used was limited to adherence to the CPGs  
29  
30  
31 10 for perioperative antibiotic use and therefore describes only one aspect of healthcare quality.  
32  
33  
34 11 Fourth, as we used administrative claims data, we could not know the clinical information in  
35  
36  
37 12 detail including appropriate exceptions in clinical practice. However, in this study, we  
38  
39  
40 13 focused on perioperative antibiotic prophylaxis of the 11 surgeries, which we could identify  
41  
42  
43 14 accurately based on the information of surgical procedure and drug use from the database.  
44  
45  
46 15 Finally, we were not able to identify the amount of investment or the affordability of each  
47  
48  
49 16 hospital's IT infrastructure, and further studies are needed to examine the total effect of these  
50  
51  
52 17 issues on the quality of hospital care.  
53  
54  
55 18

## 1 **5. Conclusions**

2 Hospitals with superior IT infrastructure may provide higher-quality care. The provision of  
3 access to paid medical evidence databases and accessibility to the Internet were strongly  
4 associated with hospital quality of care, and may be key factors for improving healthcare  
5 quality in larger or teaching hospitals. These infrastructure elements may allow healthcare  
6 professionals to retrieve the latest information on evidence-based medicine with greater ease  
7 and facilitate the dissemination of CPGs in the Internet era. Hospitals should focus on  
8 establishing adequate IT infrastructure to support the effective implementation of CPGs. The  
9 systematic improvement of IT infrastructure in hospitals may support greater adherence to  
10 CPGs and narrow the evidence-practice gaps.

## 11 **Acknowledgements**

12 We are grateful to all hospital administrators in the QIP hospitals who participated in this  
13 questionnaire survey. Furthermore, we sincerely appreciate the interviewees of several  
14 leading teaching hospitals for their time and assistance. Finally, we thank all staff at the  
15 Department of EBM and Guidelines, Japan Council for Quality Health Care who were  
16 involved in the Minds-QIP project.

## 17 **Contributors**

18 NS and YI had full access to all the data in the study and take responsibility for the analysis  
19 and interpretation. Conception and design: NS, YI; Acquisition of data and analysis: NS, YI;

1  
2  
3  
4 1 Interpretation of data: NS, NY, AO, MY, HS, YI; Drafting of the manuscript and statistical  
5  
6  
7 2 analysis: NS, YI; Obtaining funding: NY, YI. All the authors (NS, NY, AO, MY, HS, and YI)  
8  
9  
10 3 were involved in critical revisions and approved the final manuscript for publication.  
11  
12

#### 13 4 **Funding**

14  
15  
16 5 This research was financially supported by the Ministry of Health, Labour and Welfare of  
17  
18  
19 6 Japan and Japan Council for Quality Health Care.  
20  
21

#### 22 7 **Competing interests**

23  
24  
25 8 The authors declare that they have no competing interests.  
26  
27

#### 28 9 **Ethics approval**

29  
30  
31 10 This study was approved by both the Ethics Committee of Kyoto University Graduate School  
32  
33  
34 11 and Faculty of Medicine, Japan (R0979, R0135) and that of Japan Council for Quality Health  
35  
36  
37 12 Care (Rin26-4). Informed consent was received from all participants prior to the survey, and  
38  
39  
40 13 they were also informed that the data was being collected for research purposes. Regarding  
41  
42  
43 14 the DPC data, we collect anonymous data based on a process designated by the ethics  
44  
45  
46 15 guideline from the Japanese government, and the consent to participate from each patients  
47  
48  
49 16 was omitted.  
50  
51

#### 52 17 **Provenance and peer review**

53  
54  
55 18 Not commissioned; externally peer reviewed.  
56  
57  
58  
59  
60



1  
2  
3  
4 **1 Data sharing statement**

5  
6  
7 2 No data are available.  
8  
9

10  
11 **3 REFERENCES**  
12  
13

- 14 [1] Gray P, Olfman L. Careers and education in information systems. In: Bates MJ,  
15 editor. Understanding information retrieval systems: management, types and standards. Boca  
16 Raton: CRC Press; 2011. p. 91-110.  
17  
18 [2] van der Weijden T, Pieterse AH, Koelewijn-van Loon MS, Knaapen L, Légaré F, Boivin  
19 A, et al. How can clinical practice guidelines be adapted to facilitate shared decision making?  
20 A qualitative key-informant study. *BMJ Qual Saf.* 2013;22:855-63  
21  
22 [3] Légaré F, Witteman HO. Shared decision making: examining key elements and barriers to  
23 adoption into routine clinical practice. *Health Aff.* 2013;32:276-84.  
24  
25 [4] Blanc X, Collet TH, Auer R, Fischer R, Locatelli I, Iriarte P, et al. Publication trends of  
26 shared decision making in 15 high impact medical journals: a full-text review with  
27 bibliometric analysis. *BMC Med Inform Decis Mak.* 2014;14:71.  
28  
29 [5] Lang ES, Wyer PC, Haynes RB. Knowledge translation: Closing the evidence-to-practice  
30 gap. *Ann Emerg Med.* 2007;49:355-63.  
31  
32 [6] Institute of Medicine, Committee on quality of health care in America. Crossing the quality  
33 chasm: a new health system for the 21<sup>st</sup> century. Washington, DC: National Academy  
34 Press ;2001.  
35  
36  
37  
38  
39  
40  
41  
42  
43  
44  
45  
46  
47  
48  
49  
50  
51  
52  
53  
54  
55  
56  
57  
58  
59  
60

- 1  
2  
3  
4 1 [7] Grimshaw JM, Thomas RE, MacLennan G, Fraser C, Ramsay CR, Vale L, et al.  
5  
6  
7 2 Effectiveness and efficiency of guideline dissemination and implementation strategies. *Health*  
8  
9  
10 3 *Technol Assess.* 2004;8:1-72.
- 11  
12  
13 4 [8] McGlynn EA, Asch SM, Adams J, Keesey J, Hicks J, DeCristofaro A, et al. The quality of  
14  
15  
16 5 health care delivered to adults in the United States. *N Engl J Med.* 2003;26:79-89.
- 17  
18  
19 6 [9] Gagliardi AR, Brouwers MC. Do guidelines offer implementation advice to target users?  
20  
21  
22 7 A systematic review of guideline applicability. *BMJ Open.* 2015;5:e007047. doi:  
23  
24  
25 8 10.1136/bmjopen-2014-007047.
- 26  
27  
28 9 [10] Ubbink DT, Vermeulen H, Knops AM, Legemate DA, Oude Rengerink K, Heineman MJ,  
29  
30  
31 10 et al. Implementation of evidence-based practice: outside the box, throughout the hospital.  
32  
33  
34 11 *Neth J Med.* 2011;69:87-94.
- 35  
36  
37 12 [11] Gagliardi AR, Brouwers MC, Palda VA, Lemieux-Charles L, Grimshaw JM. How can  
38  
39  
40 13 we improve guideline use? A conceptual framework of implementability. *Implement Sci.*  
41  
42  
43 14 2011;6:26.
- 44  
45  
46 15 [12] Grimshaw J, Eccles M, Tetroe J. Implementing clinical guidelines: current evidence and  
47  
48  
49 16 future implications. *J Contin Educ Health Prof.* 2004;24 Suppl 1:S31-7. Review.
- 50  
51  
52 17 [13] Cochrane LJ, Olson CA, Murray S, Dupuis M, Tooman T, Hayes S. Gaps between  
53  
54  
55 18 knowing and doing: understanding and assessing the barriers to optimal health care. *J Contin*  
56  
57  
58 19 *Educ Health Prof.* 2007;27:94-102.
- 59  
60

- 1  
2  
3  
4 1 [14] Cabana MD, Rand CS, Powe NR, Wu AW, Wilson MH, Abboud PA, et al. Why don't  
5  
6  
7 2 physicians follow clinical practice guidelines? A framework for improvement.  
8  
9  
10 3 JAMA.1999;28:1458-65. Review.  
11  
12  
13 4 [15] Barth JH, Misra S, Aakre KM, Langlois MR, Watine J, Twomey PJ, et al. Why are  
14  
15  
16 5 clinical practice guidelines not followed? Clin Chem Lab Med.2016;54:1133-39.  
17  
18  
19 6 [16] Taba P, Rosenthal M, Habicht J, Tarien H, Mathiesen M, Hill S, et al. Barriers and  
20  
21  
22 7 facilitators to the implementation of clinical practice guidelines: a cross-sectional survey  
23  
24  
25 8 among physicians in Estonia. BMC Health Serv Res.2012;12:455  
26  
27  
28 9 [17] Lyons SS, Tripp-Reimer T, Sorofman BA, Dewitt JE, Bootsmiller BJ, Vaughn TE, et al.  
29  
30  
31 10 VA QUERI informatics paper: information technology for clinical guideline implementation:  
32  
33  
34 11 perceptions of multidisciplinary stakeholders. J Am Med Inform Assoc. 2005;12:64-71.  
35  
36  
37 12 [18] De Vos M, Graafmans W, Kooistra M, Meijboom B, Van Der Voort P, Westert G. Using  
38  
39  
40 13 quality indicators to improve hospital care: a review of the literature. Int J Qual Health  
41  
42  
43 14 Care.2009;21;11.  
44  
45  
46 15 [19] Jones SS, Rudin RS, Perry T, Shekelle PG. Health information technology: an updated  
47  
48  
49 16 systematic review with a focus on meaningful use. Ann Intern Med. 2014;160: 48–54.  
50  
51  
52 17 [20] Chaudhry B, Wang J, Wu S, Maglione M, Mojica W, Roth E, et al. Systematic review:  
53  
54  
55 18 impact of health information technology on quality, efficiency, and costs of medical care. Ann  
56  
57  
58 19 Intern Med. 2006;144: 742–52.  
59  
60

- 1  
2  
3  
4 1 [21] Menachemi N, Chukmaitov A, Saunders C, Brooks RG. Hospital quality of care: does  
5  
6  
7 2 information technology matter? The relationship between information technology adoption  
8  
9  
10 3 and quality of care. *Health Care Manage Rev.* 2008;33: 51–9.  
11  
12  
13 4 [22] Medical Information Network Distribution Service (Minds).  
14  
15  
16 5 <http://minds.jcqhcc.or.jp/english/english.php> (accessed 7 June 2018).  
17  
18  
19 6 [23] Sasaki N, Lee J, Park S, Umegaki T, Kunisawa S, Otsubo T, et al. Development and  
20  
21  
22 7 validation of an acute heart failure-specific mortality predictive model based on  
23  
24  
25 8 administrative data. *Can J Cardiol.* 2013;29: 1055–61.  
26  
27  
28 9 [24] Hamada H, Sekimoto M, Imanaka Y. Effects of the per diem prospective payment  
29  
30  
31 10 system with DRG-like grouping system (DPC/PDPS) on resource usage and healthcare  
32  
33  
34 11 quality in Japan. *Health Policy.* 2012;107:194-201.  
35  
36  
37 12 [25] Japanese Association for Infectious Diseases, Japanese Society of Chemotherapy, ed.  
38  
39  
40 13 Guidelines for antibiotic use. Tokyo; Kyowa Kikaku.2005-2010.[Only in Japanese]  
41  
42  
43 14 [26] Kass, GV. An exploratory technique for investigating large quantities of categorical data.  
44  
45  
46 15 *Journal of Applied Statistics.*1980;29, 119-127.  
47  
48  
49 16 [27] Huang YH, Wu CY, Lin KC, Hsieh YW, Snow WM, Wang TN. Determinants of change  
50  
51  
52 17 in stroke-specific quality of life after distributed constraint-induced therapy. *Am J Occup Ther.*  
53  
54  
55 18 2013;67,54-63.  
56  
57  
58 19 [28] Dudley WN, Dilorio C, Soet J. Detecting and explicating interactions in categorical data.  
59  
60

- 1  
2  
3  
4 1 Nurs Res. 2000;49,53-6.  
5  
6  
7 2 [29] Nisbet R, Elder J, Miner G. Handbook of Statistical Analysis and Data Mining  
8  
9  
10 3 Applications. Academic Press. 2009  
11  
12  
13 4 [30] Maeda A, Araujo E, Cashin C, Harris J, Ikegami N, Reich MR. Universal Health  
14  
15  
16 5 Coverage for Inclusive and Sustainable Development: A Synthesis of 11 Country Case  
17  
18  
19 6 Studies. Washington, DC; The World Bank. 2014  
20  
21  
22 7 [31] Séror AC. Internet infrastructures and health care systems: a qualitative comparative  
23  
24  
25 8 analysis on networks and markets in the British National Health Service and Kaiser  
26  
27  
28 9 Permanente. J Med Internet Res. 2002;4,E21.  
29  
30  
31 10 [32] Peter J, Peredy G. The Permanente knowledge connection: A national  
32  
33  
34 11 strategy for clinician use of web technology. Report of the web integration council -clinical  
35  
36  
37 12 subcommittee. The Permanente Journal. 1998;2,69-75.  
38  
39  
40 13 [33] King DN. The contribution of hospital library information services to clinical care: a  
41  
42  
43 14 study in eight hospitals. Bull Med Libr Assoc. 1987;75,291-301.  
44  
45  
46 15 [34] Weightman AL, Williamson J; Library & Knowledge Development Network (LKDN)  
47  
48  
49 16 Quality and Statistics Group. The value and impact of information provided through library  
50  
51  
52 17 services for patient care: a systematic review. Health Info Libr J. 2005;22,4-25.  
53  
54  
55 18 [35] Chiu YW, Weng YH, Lo HL, Shih YH, Hsu CC, Kuo KN. Comparison of accessing  
56  
57  
58 19 online databases between physicians and nurses in Taiwan. Inform Health Soc Care  
59  
60

- 1  
2  
3  
4 1 2012;37:230-41.  
5  
6  
7 2 [36] Doebbeling BN, Chou AF, Tierney WM. Priorities and strategies for the implementation  
8  
9  
10 3 of integrated informatics and communications technology to improve evidence-based practice.  
11  
12  
13 4 J Gen Intern Med. 2006;21:S50-7.  
14  
15  
16 5 [37] Ministerio de Salud y Protección Social. Implementation manual for evidence-based  
17  
18  
19 6 clinical practice guidelines in health institutions in colombia.2014.  
20  
21  
22 7 [http://gpc.minsalud.gov.co/recursos/Documentos%20compartidos/Implementation\\_guide\\_ing](http://gpc.minsalud.gov.co/recursos/Documentos%20compartidos/Implementation_guide_ing)  
23  
24  
25 8 [les.pdf](#) (accessed 13 February 2019)  
26  
27  
28 9 [38] Hamilton AB, Mittman BS. Implementation science in health care. In: Brownson RC, et al,  
29  
30  
31 10 editor. Dissemination and implementation research in health: translating science into  
32  
33  
34 11 practice. 2<sup>nd</sup> ed. New York: Oxford University Press; 2018. p. 385-400.  
35  
36  
37 12 [39] Goodall AH. Physician-leaders and hospital performance: is there an association?  
38  
39  
40 13 Soc Sci Med. 2011;73:535-539.  
41  
42  
43 14 [40] Bloom N, Garicano L, Sadun R, Van Reenen J. The distinct effects of information  
44  
45  
46 15 technology and communication technology on firm organization. Management  
47  
48  
49 16 Science. 2014;60:2859-2885.  
50  
51  
52  
53  
54  
55  
56  
57  
58  
59  
60

1  
2  
3  
4 **1 Figure legends**

5  
6  
7 2 Figure 1. Flow diagram of the subject hospital selection process.

8  
9  
10 3 \*Target QI indicates QI of perioperative antibiotic prophylaxis of the 11 surgical procedures  
11  
12  
13 4 mentioned in the manuscript.

14  
15  
16 5 Figure 2. Information sources freely available or specifically provided by the participating  
17  
18  
19 6 hospitals (153 hospitals).

20  
21  
22 7 Figure 3. Chi-squared automatic interaction detection tree diagram showing the correlates of  
23  
24  
25 8 the QI score.

26  
27  
28 9 \* These values indicate the numbers of positive responses to questionnaire items related to (i)  
29  
30  
31 10 Electronic health records and Internet availability, (ii) wireless LAN availability, and (iii)  
32  
33  
34 11 wired LAN availability at outpatient clinics/wards. DB, database; LAN, local area network;  
35  
36  
37 12 QI, quality indicator; SD, standard deviation.

38  
39  
40 13 \*\* p=0.0499, in detail.  
41  
42  
43  
44  
45  
46  
47  
48  
49  
50  
51  
52  
53  
54  
55  
56  
57  
58  
59  
60

1

Table 1. Characteristics of the hospitals and respondents <sup>a</sup> (153 hospitals)

| Hospital characteristics              |                          |
|---------------------------------------|--------------------------|
| Beds, mean±SD (range); median         | 339 ± 182 (63-1161); 303 |
| Teaching hospitals, n(%)              | 115 (75.2)               |
| Hospital size, n(%)                   |                          |
| >500 beds                             | 25 (16.3)                |
| ≤500 beds                             | 128 (83.7)               |
| Full-time physicians, mean±SD (range) | 61.9±43.3 (8-268)        |
| Resident physicians, mean±SD (range)  | 21.2±29.2 (0-197)        |
| Respondent characteristics            |                          |
|                                       | n (%)                    |
| Sex                                   |                          |
| Male                                  | 125 (81.7)               |
| Female                                | 19 (12.4)                |
| No response                           | 9 (5.9)                  |
| Age                                   |                          |
| 20–29 years                           | 5 (3.3)                  |
| 30–39 years                           | 21 (13.7)                |
| 40–49 years                           | 28 (18.3)                |
| 50–59 years                           | 50 (32.7)                |
| 60–69 years                           | 39 (25.5)                |
| No response                           | 10 (6.5)                 |
| Appointment                           |                          |
| Hospital administrator (physician)    | 69 (45.1)                |
| Chief general manager (non-physician) | 38 (24.8)                |
| Others                                | 34 (22.2)                |
| No response                           | 12 (7.8)                 |

<sup>a</sup> Respondents answered the questions as representatives of their hospital.

SD, standard deviation.

2



1

Table 2. Hospital policies and IT infrastructure (153 hospitals)

| Questionnaire items                                                                                | n (%)      |
|----------------------------------------------------------------------------------------------------|------------|
| Hospital policies                                                                                  |            |
| Explicit policy to enhance IT infrastructure to improve accessibility to medical information (YES) | 144 (94.1) |
| Explicit recommendation for the utilization of evidence-based medicine (YES)                       | 88 (57.5)  |
| Explicit recommendation for adherence to clinical practice guidelines (YES)                        | 84 (54.9)  |
| Accessibility to the Internet and other information sources                                        |            |
| Electronic health records and Internet access                                                      |            |
| Access to both electronic health records and the Internet                                          | 110 (71.9) |
| Other                                                                                              | 43 (28.1)  |
| Wireless LAN                                                                                       |            |
| Available with no limitations/with limited access points                                           | 110 (71.9) |
| Not available                                                                                      | 43 (28.1)  |
| Major locations with wired LAN access ( <i>Multiple answers allowed</i> )                          |            |
| Outpatient clinics/wards                                                                           | 98 (64.1)  |
| Other locations (including medical offices and library)                                            | 144 (94.1) |
| Access to paid medical evidence databases ( <i>Multiple answers allowed</i> )                      |            |
| <i>Igaku Chuo Zasshi</i> (ICHUSHI) Database <in Japanese>                                          | 118 (77.1) |
| Medical databases such as UpToDate®, Clinical Key®, Ovid®, and DynaMed®                            | 84 (54.9)  |
| Medical library and intranet usability within the hospital                                         |            |
| Provision of an intranet homepage with user-friendly interface                                     | 42 (27.5)  |
| Number of full-time medical librarians                                                             |            |
| ≥1                                                                                                 | 66 (43.1)  |
| 0                                                                                                  | 87 (56.9)  |
| Medical library activities ( <i>Multiple answers allowed</i> )                                     |            |
| Periodic meetings held to improve the information retrieval environment                            | 84 (54.9)  |
| Continuously working to improve library services and usability                                     | 60 (39.2)  |
| Participation in hospital librarian associations and communication with other hospital librarians  | 25 (16.3)  |
| Other                                                                                              | 23 (15.0)  |

2 IT, information technology, LAN, local area network.

3

1

Table 3. QI scores of hospital groups according to the number of positive responses to questionnaire items on hospital policies, IT infrastructure, and hospital size (153 hospitals)

| Number of questionnaire items with positive responses                    | Mean QI score | n  |
|--------------------------------------------------------------------------|---------------|----|
| Hospital policies <sup>a</sup>                                           |               |    |
| 0                                                                        | 78.73         | 4  |
| 1                                                                        | 81.92         | 51 |
| 2                                                                        | 84.95         | 29 |
| 3                                                                        | 78.92         | 69 |
| IT infrastructure                                                        |               |    |
| Accessibility to the Internet and other information sources <sup>b</sup> |               |    |
| 0                                                                        | 78.59         | 5  |
| 1                                                                        | 82.20         | 32 |
| 2                                                                        | 78.70         | 62 |
| 3                                                                        | 83.32         | 54 |
| Access to paid medical evidence databases <sup>c</sup>                   |               |    |
| 0                                                                        | 72.55         | 25 |
| 1                                                                        | 79.76         | 54 |
| 2                                                                        | 84.88         | 74 |
| Medical library and intranet usability within the hospital <sup>d</sup>  |               |    |
| 0                                                                        | 81.70         | 21 |
| 1                                                                        | 78.45         | 45 |
| 2                                                                        | 80.25         | 39 |
| 3                                                                        | 84.40         | 26 |
| 4–6                                                                      | 83.27         | 22 |
| Hospital size and teaching status                                        |               |    |
| >500-bed non-teaching                                                    | 87.64         | 4  |
| >500-bed teaching                                                        | 83.28         | 21 |
| ≤500-bed teaching                                                        | 83.16         | 94 |
| ≤500-bed non-teaching                                                    | 73.10         | 34 |

Questionnaire items are as follows:

<sup>a</sup> Three items: having explicit policy to enhance IT infrastructure, explicit recommendation for the utilization of evidence-based medicine, and explicit recommendation to use clinical practice guidelines.

<sup>b</sup> Three items: Electronic health records and Internet availability, wireless LAN availability, wired LAN availability at outpatient clinics/wards.

<sup>c</sup> Two items: provision of access to the Japanese medical database and access to English-language medical databases.

<sup>d</sup> Six items: provision of access to an intranet homepage, one or more full-time medical librarians, periodic meetings for library improvement, continuously working to improve library services and usability, communication with other hospital librarians, and others.

IT, information technology; LAN, local area network; QI, quality indicator.

2

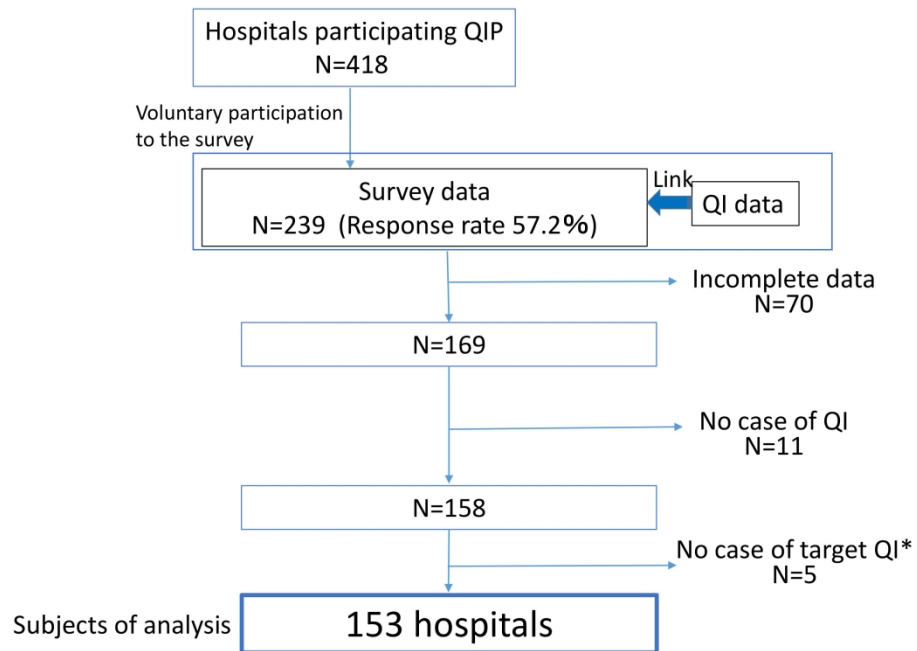

31 Figure 1. Flow diagram of the subject hospital selection process.

32 \*Target QI indicates QI of perioperative antibiotic prophylaxis of the 11 surgical procedures mentioned in  
33 the manuscript.

34 254x190mm (300 x 300 DPI)

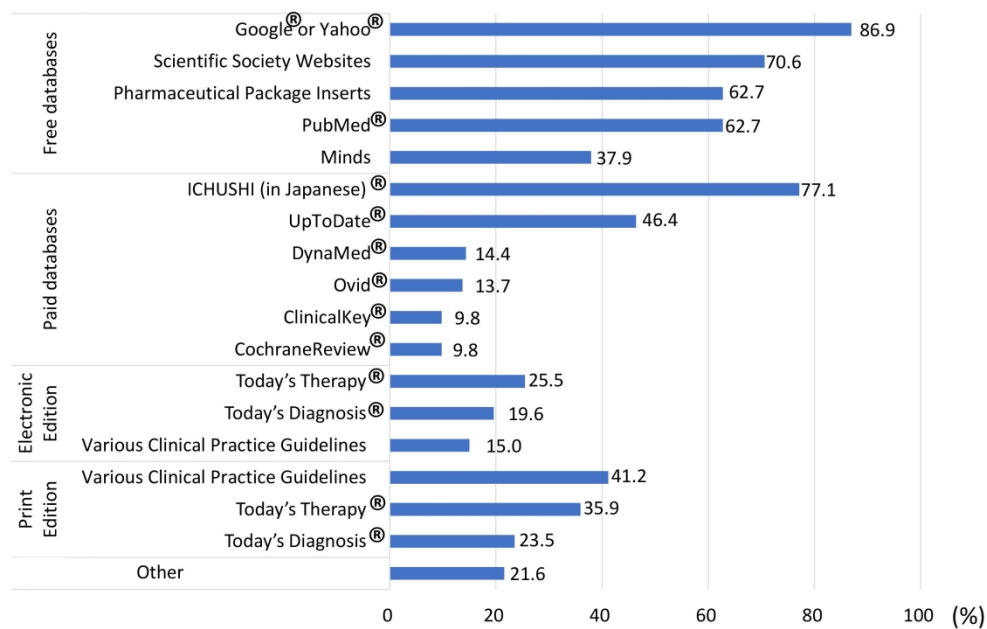

Figure 2. Information sources freely available or specifically provided by the participating hospitals (153 hospitals).

245x158mm (300 x 300 DPI)

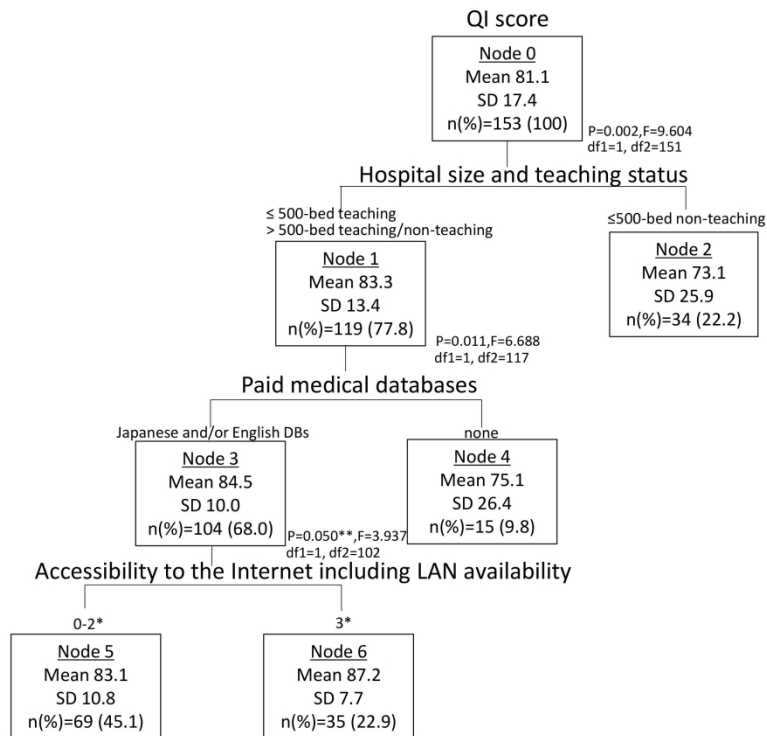

31 Figure 3. Chi-squared automatic interaction detection tree diagram showing the correlates of the QI score.

32 \* These values indicate the numbers of positive responses to questionnaire items related to (i) Electronic  
33 health records and Internet availability, (ii) wireless LAN availability, and (iii) wired LAN availability at  
34 outpatient clinics/wards. DB, database; LAN, local area network; QI, quality indicator; SD, standard  
35 deviation.

36 \*\* p=0.0499, in detail.

37 254x190mm (300 x 300 DPI)

## Appendix\_Table. Original Questions

Q1-1. Does your hospital have an explicit policy to enhance IT infrastructure in order to improve accessibility to medical information?

- Yes  No  Other

Q1-2. What information sources are available in your hospital? (Please choose all options that would apply)

1. PubMed  2. Google/Yahoo  3. Pharmaceutical Package Inserts  4. Pharmaceutical Interview Forms  
 5. Scientific Society Websites  6. MINDS  
 7. *Igaku Chuo Zasshi* (ICHUSHI) Medical Literature Database [**Hospital** Subscription]  
 8. *Igaku Chuo Zasshi* (ICHUSHI) Medical Literature Database [**Medical Office** Subscription]  
 9. UpToDate [**Hospital** Subscription]  10. UpToDate [**Medical Office** Subscription]  
 11. Cochrane Review  12. ClinicalKey  13. Ovid  14. DynaMed  
 15. *Today's Diagnosis* [**Electronic Edition**]  16. *Today's Therapy* [**Electronic Edition**]  
 17. Various Clinical Practice Guidelines [**Electronic Versions**]  
 18. *Today's Diagnosis* [**Print Edition**]  19. *Today's Therapy* [**Print Edition**]  
 20. Various Clinical Practice Guidelines [**Print Versions**]  21. Other

Q2-1. What type of accessibility to the Internet and other information sources is available in your hospital?

- Access to both electronic health records (EHRs) and the Internet is permitted from the same computer.  
 Access to both EHRs and the Internet is permitted from different computers.  
 Access to EHRs is permitted only in the hospital network. Therefore, healthcare workers have to use their own computers to access the Internet.  
 EHRs are not available.  
 Other

Q2-2. Is *wireless* LAN available in your hospital?

- Yes, available with no limitations.  Yes, with limited access points.  No, not available.

Q2-3. Where are the major locations in your hospital for Internet use with *wired* LAN access? (*Multiple answers allowed*)

- Outpatient clinics  Wards  Medical offices  Libraries  
 Other

Q3-1. How many librarians are there in your hospital?

- Full-time:  Part-time:

Q3-2. Does your hospital provide an intranet homepage with user-friendly interface?

- Yes  No  Other

Q3-3. Which applies to your hospital regarding medical library activities? (*Multiple answers allowed*)

- Periodic meetings held to improve the information retrieval environment  
 Continuously working to improve library services and usability (e.g., promoting paperless movements)  
 Participation in hospital librarian associations and communication with other hospital librarians  
 Other

Q4. Do you have an explicit recommendation for the utilization of evidence-based medicine in your hospital?

- Yes  No  Other

Q5. Do you have an explicit recommendation for adherence to clinical practice guidelines in your hospital?

- Yes  No  Other

**STROBE 2007 (v4) Statement—Checklist of items that should be included in reports of *cross-sectional studies***

| Section/Topic                | Item # | Recommendation                                                                                                                                                                       | Reported on page # |
|------------------------------|--------|--------------------------------------------------------------------------------------------------------------------------------------------------------------------------------------|--------------------|
| <b>Title and abstract</b>    | 1      | (a) Indicate the study's design with a commonly used term in the title or the abstract                                                                                               | 1                  |
|                              |        | (b) Provide in the abstract an informative and balanced summary of what was done and what was found                                                                                  | 2-3                |
| <b>Introduction</b>          |        |                                                                                                                                                                                      |                    |
| Background/rationale         | 2      | Explain the scientific background and rationale for the investigation being reported                                                                                                 | 2, 5-6             |
| Objectives                   | 3      | State specific objectives, including any prespecified hypotheses                                                                                                                     | 2,6                |
| <b>Methods</b>               |        |                                                                                                                                                                                      |                    |
| Study design                 | 4      | Present key elements of study design early in the paper                                                                                                                              | 2,7-8              |
| Setting                      | 5      | Describe the setting, locations, and relevant dates, including periods of recruitment, exposure, follow-up, and data collection                                                      | 2,7-11             |
| Participants                 | 6      | (a) Give the eligibility criteria, and the sources and methods of selection of participants                                                                                          | 7-8                |
| Variables                    | 7      | Clearly define all outcomes, exposures, predictors, potential confounders, and effect modifiers. Give diagnostic criteria, if applicable                                             | 7-11               |
| Data sources/<br>measurement | 8*     | For each variable of interest, give sources of data and details of methods of assessment (measurement). Describe comparability of assessment methods if there is more than one group | 7-11               |
| Bias                         | 9      | Describe any efforts to address potential sources of bias                                                                                                                            | 17                 |
| Study size                   | 10     | Explain how the study size was arrived at                                                                                                                                            | 7-11               |
| Quantitative variables       | 11     | Explain how quantitative variables were handled in the analyses. If applicable, describe which groupings were chosen and why                                                         | 7-11, Table3       |
| Statistical methods          | 12     | (a) Describe all statistical methods, including those used to control for confounding                                                                                                | 9-11               |
|                              |        | (b) Describe any methods used to examine subgroups and interactions                                                                                                                  | 9-11               |
|                              |        | (c) Explain how missing data were addressed                                                                                                                                          | Fig1.              |
|                              |        | (d) If applicable, describe analytical methods taking account of sampling strategy                                                                                                   | *                  |
|                              |        | (e) Describe any sensitivity analyses                                                                                                                                                | *                  |
| <b>Results</b>               |        |                                                                                                                                                                                      |                    |

|                          |     |                                                                                                                                                                                                              |                          |
|--------------------------|-----|--------------------------------------------------------------------------------------------------------------------------------------------------------------------------------------------------------------|--------------------------|
| Participants             | 13* | (a) Report numbers of individuals at each stage of study—eg numbers potentially eligible, examined for eligibility, confirmed eligible, included in the study, completing follow-up, and analysed            | 11, Fig1.                |
|                          |     | (b) Give reasons for non-participation at each stage                                                                                                                                                         | *                        |
|                          |     | (c) Consider use of a flow diagram                                                                                                                                                                           | 11, Fig1.                |
| Descriptive data         | 14* | (a) Give characteristics of study participants (eg demographic, clinical, social) and information on exposures and potential confounders                                                                     | 11, Table 1.             |
|                          |     | (b) Indicate number of participants with missing data for each variable of interest                                                                                                                          | Fig1.                    |
| Outcome data             | 15* | Report numbers of outcome events or summary measures                                                                                                                                                         | Table 3. Figure 2.       |
| Main results             | 16  | (a) Give unadjusted estimates and, if applicable, confounder-adjusted estimates and their precision (eg, 95% confidence interval). Make clear which confounders were adjusted for and why they were included | 11-13, Table 2.          |
|                          |     | (b) Report category boundaries when continuous variables were categorized                                                                                                                                    | 11-13, Table 3           |
|                          |     | (c) If relevant, consider translating estimates of relative risk into absolute risk for a meaningful time period                                                                                             | *                        |
| Other analyses           | 17  | Report other analyses done—eg analyses of subgroups and interactions, and sensitivity analyses                                                                                                               | 11-13, Table 3 Figure 3. |
| <b>Discussion</b>        |     |                                                                                                                                                                                                              |                          |
| Key results              | 18  | Summarise key results with reference to study objectives                                                                                                                                                     | 2-4,13,17-18             |
| Limitations              | 19  | Discuss limitations of the study, taking into account sources of potential bias or imprecision. Discuss both direction and magnitude of any potential bias                                                   | 4, 17-18                 |
| Interpretation           | 20  | Give a cautious overall interpretation of results considering objectives, limitations, multiplicity of analyses, results from similar studies, and other relevant evidence                                   | 4,13-18                  |
| Generalisability         | 21  | Discuss the generalisability (external validity) of the study results                                                                                                                                        | 4,18                     |
| <b>Other information</b> |     |                                                                                                                                                                                                              |                          |
| Funding                  | 22  | Give the source of funding and the role of the funders for the present study and, if applicable, for the original study on which the present article is based                                                | 20                       |

\*Give information separately for cases and controls in case-control studies and, if applicable, for exposed and unexposed groups in cohort and cross-sectional studies.

**Note:** An Explanation and Elaboration article discusses each checklist item and gives methodological background and published examples of transparent reporting. The STROBE checklist is best used in conjunction with this article (freely available on the Web sites of PLoS Medicine at <http://www.plosmedicine.org/>, Annals of Internal Medicine at <http://www.annals.org/>, and Epidemiology at <http://www.epidem.com/>). Information on the STROBE Initiative is available at [www.strobe-statement.org](http://www.strobe-statement.org).



# BMJ Open

## Does Hospital Information Technology Infrastructure Promote the Implementation of Clinical Practice Guidelines? A Multicenter Observational Study of Japanese Hospitals

|                                 |                                                                                                                                                                                                                                                                                                                                                                                                                                                                                                                                                            |
|---------------------------------|------------------------------------------------------------------------------------------------------------------------------------------------------------------------------------------------------------------------------------------------------------------------------------------------------------------------------------------------------------------------------------------------------------------------------------------------------------------------------------------------------------------------------------------------------------|
| Journal:                        | <i>BMJ Open</i>                                                                                                                                                                                                                                                                                                                                                                                                                                                                                                                                            |
| Manuscript ID                   | bmjopen-2018-024700.R2                                                                                                                                                                                                                                                                                                                                                                                                                                                                                                                                     |
| Article Type:                   | Research                                                                                                                                                                                                                                                                                                                                                                                                                                                                                                                                                   |
| Date Submitted by the Author:   | 12-Apr-2019                                                                                                                                                                                                                                                                                                                                                                                                                                                                                                                                                |
| Complete List of Authors:       | Sasaki, Noriko; Kyoto University Graduate School of Medicine, Department of Healthcare Economics and Quality Management<br>Yamaguchi, Naohito; Japan Council for Quality Health Care, Tokyo, Japan<br>Okumura, Akiko; Japan Council for Quality Health Care, Tokyo, Japan<br>Yoshida, Masahiro; Japan Council for Quality Health Care, Tokyo, Japan<br>Sugawara, Hiroyuki; Japan Council for Quality Health Care, Tokyo, Japan<br>Imanaka, Yuichi; Kyoto University Graduate School of Medicine, Department of Healthcare Economics and Quality Management |
| <b>Primary Subject Heading</b>: | Evidence based practice                                                                                                                                                                                                                                                                                                                                                                                                                                                                                                                                    |
| Secondary Subject Heading:      | Health informatics                                                                                                                                                                                                                                                                                                                                                                                                                                                                                                                                         |
| Keywords:                       | Clinical practice guidelines, evidence-based practice, quality indicators, healthcare quality, hospital IT infrastructure, evidence-practice gaps                                                                                                                                                                                                                                                                                                                                                                                                          |
|                                 |                                                                                                                                                                                                                                                                                                                                                                                                                                                                                                                                                            |

SCHOLARONE™  
Manuscripts

1  
2  
3  
4 1 **Does Hospital Information Technology Infrastructure Promote the Implementation of**  
5  
6  
7 2 **Clinical Practice Guidelines? A Multicenter Observational Study of Japanese Hospitals**  
8  
9

10 3  
11  
12  
13 4 Noriko Sasaki, MD, PhD,<sup>1</sup> Naohito Yamaguchi, MD, PhD,<sup>2</sup> Akiko Okumura, MPH,<sup>2</sup>  
14

15  
16 5 Masahiro Yoshida, MD, PhD,<sup>2</sup> Hiroyuki Sugawara, MMS,<sup>2</sup> and Yuichi Imanaka, MD, PhD<sup>1,2</sup>  
17

18  
19 6 <sup>1</sup>Department of Healthcare Economics and Quality Management,  
20

21  
22 7 Kyoto University Graduate School of Medicine, Kyoto, Japan  
23

24  
25 8 <sup>2</sup> Japan Council for Quality Health Care, Tokyo, Japan  
26

27  
28 9  
29  
30  
31 10  
32

33  
34 11  
35

36  
37 12  
38

39  
40 13 Correspondence to: Professor Yuichi Imanaka; [imanaka-y@umin.net](mailto:imanaka-y@umin.net)  
41  
42  
43  
44  
45  
46  
47  
48  
49  
50  
51  
52  
53  
54  
55  
56  
57  
58  
59  
60

1  
2  
3  
4 **1 Abstract**

5  
6  
7 **2 Objectives:** It remains unclear whether insufficient information technology (IT) infrastructure  
8  
9  
10  
11  
12  
13  
14  
15  
16  
17  
18  
19  
20  
21  
22  
23  
24  
25  
26  
27  
28  
29  
30  
31  
32  
33  
34  
35  
36  
37  
38  
39  
40  
41  
42  
43  
44  
45  
46  
47  
48  
49  
50  
51  
52  
53  
54  
55  
56  
57  
58  
59  
60  
3 in hospitals hinders implementation of clinical practice guidelines (CPGs) and affects health  
4 care quality. The objectives of this study were to describe the present state of IT infrastructure  
5 provided in acute care hospitals across Japan and to investigate its association with healthcare  
6 quality.

7 **7 Methods:** A questionnaire survey of hospital administrators was conducted in 2015 to gather  
8 information on hospital-level policies and elements of IT infrastructure. The number of  
9 positive responses by each respondent to the survey items was tallied. Next, a composite  
10 quality indicator score of hospital adherence to CPGs for perioperative antibiotic prophylaxis  
11 was calculated using administrative claims data. Based on this quality indicator score, we  
12 performed a chi-squared automatic interaction detection (CHAID) analysis to identify  
13 correlates of hospital healthcare quality. The independent variables included hospital size and  
14 teaching status in addition to hospital policies and elements of IT infrastructure.

15 **15 Results:** Wide variations were observed in the availability of various IT infrastructure  
16 elements across hospitals, especially in local area network availability and access to paid  
17 evidence databases. The CHAID analysis showed that hospitals with a high level of access to  
18 paid databases ( $p<0.05$ ) and Internet ( $p<0.05$ ) were strongly associated with increased care  
19 quality in larger or teaching hospitals.

1  
2  
3  
4 1 **Conclusions:** Hospitals with superior IT infrastructure may provide higher-quality care. This  
5  
6  
7 2 allows clinicians to easily access the latest information on evidence-based medicine and  
8  
9  
10 3 facilitate the dissemination of CPGs. The systematic improvement of hospital IT  
11  
12  
13 4 infrastructure may promote CPG use and narrow the evidence-practice gaps.  
14  
15  
16 5 **Key words:** Clinical practice guidelines; evidence-based practice; quality indicators;  
17  
18  
19 6 healthcare quality; hospital IT infrastructure; evidence-practice gaps.  
20  
21  
22  
23  
24  
25  
26  
27  
28  
29  
30  
31  
32  
33  
34  
35  
36  
37  
38  
39  
40  
41  
42  
43  
44  
45  
46  
47  
48  
49  
50  
51  
52  
53  
54  
55  
56  
57  
58  
59  
60

## 1 **Strengths and limitations of this study**

- 2 ● We integrated a hospital questionnaire survey and administrative claims data at hospital  
3 level in the analysis.
- 4 ● We described the present state of IT infrastructure of Japanese acute care hospitals and  
5 investigated its association with a composite quality indicator of adherence to the  
6 guidelines for perioperative antibiotic prophylaxis, using a chi-squared automatic  
7 interaction detection analysis.
- 8 ● As an infrastructure to promote evidence-based practice, we focused on IT infrastructure  
9 such as accessibility to the Internet and other information sources, access to paid medical  
10 evidence databases, and medical library and intranet usability within hospitals.
- 11 ● The QI that we used was limited to adherence to the guidelines for perioperative  
12 antibiotic use and therefore describes only one aspect of healthcare quality.
- 13 ● As we used administrative claims data, we could not know the clinical information in  
14 detail including appropriate exceptions in clinical practice.

## 1. Introduction

Due to the growth of renewed medical information and frequent updates to clinical practice guidelines (CPGs) in the Internet era, clinicians can find it difficult to keep abreast of the latest evidence. The availability and usability of hospital information technology (IT) infrastructure such as wireless local area networks (LAN) and medical evidence databases may affect the ability of clinicians to update their knowledge and practice, which can influence the quality of provided care. These infrastructure elements may facilitate accessibility to various updated CPGs, which would be essential for CPG implementation in daily practice [1].

CPGs for various diseases have been developed worldwide not only to help clinicians but also to promote shared decision making with patients [2-4]. However, CPGs continue to be underused even in countries even where CPGs are well developed over the past several decades. These gaps between medical evidence and clinical practice (i.e., “evidence-practice gaps”) can lead to the provision of substandard or potentially harmful care to patients [5-11]. System-level barriers as well as individual-level barriers to evidence-based practice have been revealed in previous studies [12-17]. For example, institutional equipment, technological capital, and accessibility to guideline-related resources have been found to be important in addition to individual awareness, familiarity and agreement with the contents [15-17]. Clinical quality indicators (QIs) can monitor clinicians’ adherence to the guidelines, but they

1  
2  
3  
4 1 are not necessarily utilized to assess guideline implementation [18]. Furthermore, there is no  
5  
6  
7 2 clear evidence regarding whether hospital IT infrastructure may affect the quality of provided  
8  
9  
10 3 care using these QIs.  
11  
12

13 4 On the other hand, research related to the adoption of health information technology at the  
14  
15  
16 5 organizational level is growing, and a number of studies have reported positive effects on  
17  
18  
19 6 quality, safety and efficiency [19-21]. However, most of these studies have focused on  
20  
21  
22 7 clinical decision support systems, order entry, telecommunication systems, e-Prescriptions  
23  
24  
25 8 [19,20] and strategic management systems [21]. It thus remains unclear as to whether the lack  
26  
27  
28 9 of an adequate IT infrastructure for medical information retrieval is a crucial system-level  
29  
30  
31 10 barrier for CPG implementation. In Japan, over 180 evidence-based CPGs have been assessed  
32  
33  
34 11 and disseminated by the government-funded Medical Information Network Distribution  
35  
36  
37 12 Service (Minds) Guideline Center [22] over the last decade, but the actual use of these CPGs  
38  
39  
40 13 in daily clinical practice remains unknown.  
41  
42

43 14 This multicenter study aimed to describe the present state of IT infrastructure provided in  
44  
45  
46 15 Japanese acute care hospitals and to investigate its association with healthcare quality, taking  
47  
48  
49 16 into account hospital size, hospital policies promoting evidence-based practice.  
50  
51  
52 17  
53  
54  
55  
56  
57  
58  
59  
60





1  
2  
3  
4 1 questionnaire was developed based on literature reviews, discussions with experts, and  
5  
6  
7 2 semi-structured face-to-face interviews with several hospital administrators and IT managers  
8  
9  
10 3 from five major teaching hospitals. Survey respondents were asked to answer questions from  
11  
12  
13 4 a concise list about their institution and policies as representatives of their hospital (Appendix  
14  
15  
16 5 Table).  
17  
18  
19 6  
20  
21  
22

## 23 7 ***2.2. Hospital policy and IT infrastructure***

24  
25  
26 8 In order to identify each hospital's policies promoting evidence-based practice, the  
27  
28  
29 9 questionnaire included items on whether the hospital has an explicit policy to enhance IT  
30  
31  
32 10 infrastructure intending to improve information accessibility, whether it explicitly  
33  
34  
35 11 recommends the practice of evidence-based medicine, and whether it explicitly encourages  
36  
37  
38 12 the use of CPGs.  
39  
40

41 13 The questionnaire was also designed to focus on the following three elements of hospital  
42  
43  
44 14 IT infrastructure: (i) accessibility to the Internet and other information sources, including  
45  
46  
47 15 wired/wireless LAN availability; (ii) access to paid medical evidence databases in English and  
48  
49  
50 16 Japanese; and (iii) medical library and intranet usability, such as the availability of a  
51  
52  
53 17 well-organized intranet interface, number of full-time medical librarians, and activities for  
54  
55  
56 18 improving the medical library.  
57  
58  
59 19  
60

### 1 **2.3. Hospital quality of care**

2 As a measure of hospital quality of care, a QI of adherence to CPGs for perioperative  
3 antibiotic prophylaxis was calculated using diagnosis procedure combination (DPC)  
4 administrative claims data from the QIP. The DPC is a Japanese case-mix classification  
5 system for hospital reimbursements, and more than 1600 hospitals nationwide had adopted  
6 this system by 2016. The DPC database includes information on hospital codes, patient  
7 demographics, admission and discharge dates, admission routes, outcomes, primary and  
8 secondary diagnoses based on International Classification of Diseases (10th revision) codes,  
9 comorbidities, complications, surgeries performed, and high cost procedures [23,24]. DPC  
10 data from April 2013 to March 2014 were used as these were the most recent data available  
11 for analysis.

12 The QI of interest for this study was a composite score (range: 0 to 100) that indicated a  
13 hospital's proportion of adherence to CPGs for perioperative antibiotic prophylaxis [25], and  
14 was aggregated from the results of the following 11 surgical types (i.e., target QI in Fig.1) :  
15 evacuation of intracranial hematoma, gastrectomy, cholecystectomy, total hip replacement,  
16 mastectomy for breast cancer, thyroid surgery, prostate cancer surgery, uterine myoma  
17 surgery, uterine cancer surgery, benign ovarian tumor surgery, and ovarian cancer surgery.

18 The QI score was calculated based on the administrative data when and what kind of the  
19 antibiotics were used, and this medication information is very precise in the Japanese

1 administrative data. Therefore, the QI score is accurate in any hospital.

2

### 3 ***2.4. Statistical analysis***

4 We first calculated descriptive statistics for the hospitals' and respondents' baseline  
5 characteristics, which included hospital bed numbers, teaching status, number of full-time  
6 physicians, number of resident physicians (representing younger physicians who may be more  
7 likely to incorporate IT into their practice), as well as respondent sex, age, and appointment.

8 The responses to the questionnaire items related to hospital policies and IT infrastructure were  
9 also summarized. The main items of interest consisted of yes/no questions; we calculated each  
10 hospital's number of positive responses within each item. The hospitals were categorized into  
11 subgroups based on these response numbers, and the mean QI score was calculated for each  
12 subgroup.

13 Finally, we performed a chi-squared automatic interaction detection (CHAID) tree  
14 analysis to identify factors that determine hospital quality of care. The independent variables  
15 included hospital size and teaching status, hospital policies regarding the promotion of  
16 evidence-based practice, and IT infrastructure (accessibility to the Internet and other  
17 information sources, access to paid medical evidence databases, and medical library and  
18 intranet usability within hospitals). The dependent variable was the mean QI score for  
19 perioperative antibiotic prophylaxis. CHAID tree analysis repeatedly uses chi-square statistics

1  
2  
3  
4 1 to split independent variables into child nodes [26-28] to identify the relative interactions  
5  
6  
7 2 between the independent variables and the outcome variables. This method is a classification  
8  
9  
10 3 tree algorithm that is often utilized as a data mining method in fields with complex data sets,  
11  
12  
13 4 such as marketing, health care [27], and nursing [28]. We used the exhaustive CHAID  
14  
15  
16 5 algorithm, a modified version of the basic algorithm that performs a more thorough merging  
17  
18  
19 6 and testing of independent variables [29]. Statistical calculations were performed using SPSS  
20  
21  
22 7 20.0J software and Decision Tree (SPSS Inc, Chicago, IL).

### 8 ***2.5. Patient and public involvement***

9 There was no patients or public involvement in the design and analysis of this study.  
10  
11  
12  
13  
14  
15  
16  
17  
18  
19  
20  
21  
22  
23  
24  
25  
26  
27  
28  
29  
30  
31  
32  
33  
34  
35  
36  
37  
38  
39  
40  
41  
42  
43  
44  
45  
46  
47  
48  
49  
50  
51  
52  
53  
54  
55  
56  
57  
58  
59  
60

## 11 **3. Results**

### 12 ***3.1. Baseline characteristics, hospital policy, and IT infrastructure***

13 From the 239 hospitals that responded to the questionnaire (response rate: 57.2%), we were  
14 able to calculate and integrate the target QI data for 153 hospitals. Hospitals with data on at  
15 least one target QI were included. The hospital selection flow diagram is presented in Figure 1.  
16 The baseline characteristics of the participant hospitals and respondents are shown in Table 1.  
17 The median number of hospital beds was 303 (range: 63–1161). Approximately 75% of all  
18 the hospitals were teaching hospitals; the mean number of junior and senior residents in each

1 hospital was approximately 21.

2 Table 2 shows the results of the survey on hospital policies and IT infrastructure. Almost  
3 all respondents reported that their hospitals had an explicit policy to enhance IT infrastructure  
4 (94.1%). However, the provision of wireless LAN (71.9%) and access to paid medical  
5 evidence databases in English (54.9%) was limited. Further, an intranet homepage was  
6 provided only in a minority of hospitals (27.5%).

7 Figure 2 shows the information sources freely available or specifically provided by the  
8 participating hospitals. There were large variations in the provision of paid medical evidence  
9 databases, and hospitals tended to subscribe to the Japanese-language database (77.1%) rather  
10 than the English-language databases (9.8–46.4%). In general, the print editions of various  
11 CPGs and medical information were provided more frequently than the electronic editions,  
12 and there were relatively few hospitals that provided CPGs in either edition (41.2% in the  
13 print edition and 15.0% in the electronic edition).

### 15 ***3.2. Correlates of hospital quality of care***

16 Table 3 shows the mean QI scores for the use of perioperative antibiotics according to the  
17 various independent variables. Hospitals with a lower number of positive responses to items  
18 related to hospital policies and IT infrastructure tended to have a lower QI score. Using  
19 CHAID analysis, we identified three major correlates of QI score (Fig. 3; hospital size and

1  
2  
3  
4 1 teaching status were the strongest correlates. The subgroup of “≤ 500-bed non-teaching  
5  
6  
7 2 hospitals” had the lowest QI score (73.1 points, Node 2). The other subgroup (comprising  
8  
9  
10 3 larger or teaching hospitals) was divided into two groups based on the provision of access to  
11  
12  
13 4 paid medical evidence databases. The derived subgroup of “Japanese and/or English  
14  
15  
16 5 databases” was further divided into two groups according to (i) accessibility to the Internet,  
17  
18  
19 6 (ii) wireless LAN availability, and (iii) wired LAN availability at outpatient clinics/wards;  
20  
21  
22 7 hospitals in the subgroup that had the highest number of positive responses to these three  
23  
24  
25 8 items had the highest QI score (87.2 points, Node 6) among all nodes. In contrast, the  
26  
27  
28 9 subgroup that had positive responses to two or fewer of these items had a lower QI score  
29  
30  
31 10 (83.1 points, Node 5). The subgroup of hospitals with no IT infrastructure elements had the  
32  
33  
34 11 lowest QI score (75.1 points, Node 4) among the larger or teaching hospitals. These results  
35  
36  
37 12 indicated that the provision of access to paid medical evidence databases and accessibility to  
38  
39  
40 13 the Internet (including LAN availability) were strongly associated with hospital quality of  
41  
42  
43 14 care.  
44  
45  
46 15

#### 16 4. Discussion

17 In this multicenter study, we observed wide variations in the provision of IT infrastructure  
18 across hospitals in Japan. Our results indicated that hospitals with superior IT infrastructure  
19 tended to have higher adherence to CPGs for perioperative antibiotic prophylaxis. Using a  
20

1  
2  
3  
4 1 CHAID tree analysis, we found that the provision of access to paid medical evidence  
5  
6  
7 2 databases and accessibility to the Internet (including LAN availability) were strong indicators  
8  
9  
10 3 of quality of care in larger or teaching hospitals

11  
12  
13 4 Despite the wide availability of new medical evidence, clinicians are not always able  
14  
15  
16 5 to acquire and apply the most recent and relevant information at the right moment in their  
17  
18  
19 6 daily practice. The lack of adequate IT infrastructure may affect the ability of clinicians to  
20  
21  
22 7 access this information, thereby contributing to evidence-practice gaps. There are more than  
23  
24  
25 8 8,000 hospitals in Japan, of which 80% (and almost all clinics) are privately owned [30].  
26  
27  
28 9 Different leadership approaches among these hospitals may have resulted in considerable  
29  
30  
31 10 variations in IT infrastructure. Our analysis found that there was an overall inadequate  
32  
33  
34 11 provision of LAN, and accessibility to the Internet and electronic health records was limited  
35  
36  
37 12 among the hospitals. In addition, the print editions of various CPGs and medical information  
38  
39  
40 13 were provided more frequently than electronic editions. Previous studies on the activities to  
41  
42  
43 14 improve accessibility to medical information within specific hospital networks [31,32] have  
44  
45  
46 15 indicated the importance of hospital leadership in the development of IT infrastructure.  
47  
48

49 16 Our CHAID analysis found that the three most important correlates of hospital  
50  
51  
52 17 quality of care were hospital size and teaching status, access to paid medical evidence  
53  
54  
55 18 databases, and high accessibility to the Internet. Notably, hospital policies and library/intranet  
56  
57  
58 19 usability were not identified as major correlates. There are likely several reasons for the  
59  
60

1  
2  
3  
4 1 identification of hospital size and teaching status, access to paid medical evidence databases,  
5  
6  
7 2 and high accessibility to the Internet as the most important factors. Firstly, from an economic  
8  
9  
10 3 perspective, teaching hospitals tend to be large and more likely to have the economic  
11  
12  
13 4 capability to provide resources such as IT infrastructure and full-time librarians engaged to  
14  
15  
16 5 work on intranet development. The results in Table 2 indicate that more than half of the  
17  
18  
19 6 participating hospitals do not hire full-time medical librarians. Interviews with the  
20  
21  
22 7 administrators of several leading teaching hospitals prior to the survey revealed that some  
23  
24  
25 8 administrators were actively working to enhance their hospital's intranet environment. This  
26  
27  
28 9 included the hiring of full-time librarians to create user-friendly intranet homepages designed  
29  
30  
31 10 to guide clinicians to the most recent and relevant clinical information. Our results are  
32  
33  
34 11 consistent with those of previous reports that show improvements in medical library  
35  
36  
37 12 functionality can improve patient health outcomes while reducing the time needed for  
38  
39  
40 13 clinicians to search for required information [33,34]. From a cultural perspective, "teaching"  
41  
42  
43 14 nature of the teaching hospitals makes them more committed to evidence-based thinking and  
44  
45  
46 15 promote evidence-based practice. In the Japanese context, highly motivated teaching staffs  
47  
48  
49 16 tend to gather in large-scale teaching hospitals, and these cultural elements may also explain  
50  
51  
52 17 our results in part.

53  
54  
55 18 Secondly, we found that hospital administrators tended to provide access to free  
56  
57  
58 19 medical databases first, followed by the paid Japanese database, and finally the paid databases  
59  
60



1  
2  
3  
4 1 in English (Fig. 2). Besides the high cost of subscribing to English-language databases, the  
5  
6  
7 2 administrators may have prioritized the Japanese database due to the possible language barrier  
8  
9  
10 3 for Japanese clinicians; this phenomenon has also been observed in Taiwan [35]. However,  
11  
12  
13 4 the failure to provide medical databases in English raises concerns that the clinicians may be  
14  
15  
16 5 unable to retrieve the newest relevant information in a timely manner, which can directly  
17  
18  
19 6 impact daily clinical practice. In addition, the availability of information in English may be  
20  
21  
22 7 crucial to the efficient dissemination and effective implementation of CPGs.  
23  
24

25 8 Thirdly, the importance of Internet accessibility (including LAN availability) to  
26  
27  
28 9 healthcare quality has been similarly observed in previous studies from the US and UK  
29  
30  
31 10 [1,21,31]. Our study sample included a fairly high proportion of hospitals without wireless  
32  
33  
34 11 LAN (28.1%) or with limited wired LAN availability at outpatient clinics and wards (64.1%).  
35  
36  
37 12 In order to encourage the implementation of IT infrastructure that facilitates easy retrieval of  
38  
39  
40 13 evidence in all types of hospitals, it may be necessary to develop a standardized assessment  
41  
42  
43 14 tool for hospital IT infrastructure and to include such assessments as a component of hospital  
44  
45  
46 15 accreditation.  
47  
48

49 16 In daily clinical practice, clinicians have limited time to search for and retrieve  
50  
51  
52 17 medical information. Thus, an ideal search platform would allow the use of clinical questions  
53  
54  
55 18 with several keywords and provide the requested information promptly and accurately. In  
56  
57  
58 19 addition to improving the accessibility and usability of online information, it may be useful to  
59  
60

1  
2  
3  
4 1 actively provide paid medical evidence databases (especially English-language databases) at  
5  
6  
7 2 the hospital level to supply multiple layers of information ranging from abstracts to full-text  
8  
9  
10 3 articles, as well as recommendations for CPGs and their evidence sources. In order to  
11  
12  
13 4 maximize the use of this system, individual physicians should work to improve not only their  
14  
15  
16 5 English language skills, but also their information searching skills and ability to implement  
17  
18  
19 6 new knowledge into practice.

20  
21  
22 7 Our findings suggest that larger or teaching hospitals would have the most potential for  
23  
24  
25 8 improvements in IT infrastructure that can lead to better quality of care (see Nodes 4, 5, and 6  
26  
27  
28 9 in Fig. 3). As Doebbeling et al. noted, IT implementation is dependent on the support of  
29  
30  
31 10 hospital management and “should be tailored to the needs of the organization, and not as a  
32  
33  
34 11 ‘one size fits all’ solution” [36]. It is also necessary to conduct balanced assessments of the  
35  
36  
37 12 costs and effectiveness of these IT infrastructures in order to efficiently support the  
38  
39  
40 13 implementation of evidence into practice under limited budgets.

41  
42  
43 14 In a broader context, barriers to implementing CPG recommendations in daily practice  
44  
45  
46 15 vary greatly at the individual level of specialists and physicians (e.g. perception, education,  
47  
48  
49 16 incentives, professional autonomy), the institutional level (e.g., physician leadership, hospital  
50  
51  
52 17 policies, finance, institutional culture, teamwork, IT infrastructure), national level (e.g.,  
53  
54  
55 18 policies to promote CPG use, hospital accreditation) and the social level (e.g. a culture of  
56  
57  
58 19 shared-decision making with patients, information derived from mass media) [37,38,39]. Yet,  
59  
60

1 given the growing importance of IT use in an innovative society, the impact of IT adoption on  
2 healthcare quality warrants far more consideration of the types of relationships that were  
3 revealed in this study. According to previous research, IT itself needs to be understood as  
4 having two distinct components—information technology and communication  
5 technology—and these differently affect the autonomy of workers [40]. Further examination  
6 is needed to clarify these issues in order to implement IT in practice settings.

7       There are several limitations to this study. First, the respondents were hospital  
8 administrators, which means the results may not indicate the usability of various IT  
9 infrastructure elements from a physician's perspective. In addition, as this was a self-reported  
10 survey, the possible presence of social desirability bias may have caused these respondents to  
11 underestimate the barriers being investigated. Because individual physicians are the primary  
12 target users and are likely to be the link between IT infrastructure and quality of care, studies  
13 focusing physicians are required in the future to clarify the quality improvement mechanism  
14 in detail. Second, the survey was conducted in Japan, which may limit the generalizability of  
15 our results to other countries. Third, the QI that we used was limited to adherence to the CPGs  
16 for perioperative antibiotic use and therefore describes only one aspect of healthcare quality.  
17 Fourth, as we used administrative claims data, we could not know the clinical information in  
18 detail including appropriate exceptions in clinical practice. However, in this study, we  
19 focused on perioperative antibiotic prophylaxis of the 11 surgeries, which we could identify

1 accurately based on the information of surgical procedure and drug use from the database.

2 Finally, we were not able to identify the amount of investment or the affordability of each

3 hospital's IT infrastructure, and further studies are needed to examine the total effect of these

4 issues on the quality of hospital care.

5

## 6 **5. Conclusions**

7 Hospitals with superior IT infrastructure may provide higher-quality care. The provision of  
8 access to paid medical evidence databases and accessibility to the Internet were strongly  
9 associated with hospital quality of care, and may be key factors for improving healthcare  
10 quality in larger or teaching hospitals. These infrastructure elements may allow healthcare  
11 professionals to retrieve the latest information on evidence-based medicine with greater ease  
12 and facilitate the dissemination of CPGs in the Internet era. Hospitals should focus on  
13 establishing adequate IT infrastructure to support the effective implementation of CPGs. The  
14 systematic improvement of IT infrastructure in hospitals may support greater adherence to  
15 CPGs and narrow the evidence-practice gaps.

## 16 **Acknowledgements**

17 We are grateful to all hospital administrators in the QIP hospitals who participated in this  
18 questionnaire survey. Furthermore, we sincerely appreciate the interviewees of several  
19 leading teaching hospitals for their time and assistance. Finally, we thank all staff at the

1 Department of EBM and Guidelines, Japan Council for Quality Health Care who were  
2 involved in the Minds-QIP project.

### 3 **Contributors**

4 NS and YI had full access to all the data in the study and take responsibility for the analysis  
5 and interpretation. Conception and design: NS, YI; Acquisition of data and analysis: NS, YI;  
6 Interpretation of data: NS, NY, AO, MY, HS, YI; Drafting of the manuscript and statistical  
7 analysis: NS, YI; Obtaining funding: NY, YI. All the authors (NS, NY, AO, MY, HS, and YI)  
8 were involved in critical revisions and approved the final manuscript for publication.

### 9 **Funding**

10 This research was financially supported by the Ministry of Health, Labour and Welfare of  
11 Japan and Japan Council for Quality Health Care.

### 12 **Competing interests**

13 The authors declare that they have no competing interests.

### 14 **Ethics approval**

15 This study was approved by both the Ethics Committee of Kyoto University Graduate School  
16 and Faculty of Medicine, Japan (R0979, R0135) and that of Japan Council for Quality Health  
17 Care (Rin26-4). Informed consent was received from all participants prior to the survey, and  
18 they were also informed that the data was being collected for research purposes. Regarding  
19 the DPC data, we collect anonymous data based on a process designated by the ethics

1 guideline from the Japanese government, and the consent to participate from each patients  
2 was omitted.

### 3 **Provenance and peer review**

4 Not commissioned; externally peer reviewed.

### 5 **Data sharing statement**

6 No data are available.

## 7 **REFERENCES**

- 8 [1] Gray P, Olfman L. Careers and education in information systems. In: Bates MJ,  
9 editor. Understanding information retrieval systems: management, types and standards. Boca  
10 Raton: CRC Press; 2011. p. 91-110.
- 11 [2] van der Weijden T, Pieterse AH, Koelewijn-van Loon MS, Knaapen L, Légaré F, Boivin  
12 A, et al. How can clinical practice guidelines be adapted to facilitate shared decision making?  
13 A qualitative key-informant study. *BMJ Qual Saf.* 2013;22:855-63
- 14 [3] Légaré F, Witteman HO. Shared decision making: examining key elements and barriers to  
15 adoption into routine clinical practice. *Health Aff.* 2013;32:276-84.
- 16 [4] Blanc X, Collet TH, Auer R, Fischer R, Locatelli I, Iriarte P, et al. Publication trends of  
17 shared decision making in 15 high impact medical journals: a full-text review with  
18 bibliometric analysis. *BMC Med Inform Decis Mak.* 2014;14:71.
- 19 [5] Lang ES, Wyer PC, Haynes RB. Knowledge translation: Closing the evidence-to-practice

- 1  
2  
3  
4 1 gap. *Ann Emerg Med.* 2007;49:355-63.  
5  
6  
7 2 [6] Institute of Medicine, Committee on quality of health care in America. *Crossing the quality*  
8  
9  
10 3 *chasm: a new health system for the 21<sup>st</sup> century.* Washington, DC:National Academy  
11  
12  
13 4 Press ;2001.  
14  
15  
16 5 [7] Grimshaw JM, Thomas RE, MacLennan G, Fraser C, Ramsay CR, Vale L, et al.  
17  
18  
19 6 Effectiveness and efficiency of guideline dissemination and implementation strategies. *Health*  
20  
21  
22 7 *Technol Assess.* 2004;8:1-72.  
23  
24  
25 8 [8] McGlynn EA, Asch SM, Adams J, Keesey J, Hicks J, DeCristofaro A, et al. The quality of  
26  
27  
28 9 health care delivered to adults in the United States. *N Engl J Med.* 2003;26:79-89.  
29  
30  
31 10 [9] Gagliardi AR, Brouwers MC. Do guidelines offer implementation advice to target users?  
32  
33  
34 11 A systematic review of guideline applicability. *BMJ Open.* 2015;5:e007047. doi:  
35  
36  
37 12 10.1136/bmjopen-2014-007047.  
38  
39  
40 13 [10] Ubbink DT, Vermeulen H, Knops AM, Legemate DA, Oude Rengerink K, Heineman MJ,  
41  
42  
43 14 et al. Implementation of evidence-based practice: outside the box, throughout the hospital.  
44  
45  
46 15 *Neth J Med.* 2011;69:87-94.  
47  
48  
49 16 [11] Gagliardi AR, Brouwers MC, Palda VA, Lemieux-Charles L, Grimshaw JM. How can  
50  
51  
52 17 we improve guideline use? A conceptual framework of implementability. *Implement Sci.*  
53  
54  
55 18 2011;6:26.  
56  
57  
58 19 [12] Grimshaw J, Eccles M, Tetroe J. Implementing clinical guidelines: current evidence and  
59  
60

- 1  
2  
3  
4 1 future implications. *J Contin Educ Health Prof.* 2004;24 Suppl 1:S31-7. Review.  
5  
6  
7 2 [13] Cochrane LJ, Olson CA, Murray S, Dupuis M, Tooman T, Hayes S. Gaps between  
8  
9  
10 3 knowing and doing: understanding and assessing the barriers to optimal health care. *J Contin*  
11  
12  
13 4 *Educ Health Prof.* 2007;27:94-102.  
14  
15  
16 5 [14] Cabana MD, Rand CS, Powe NR, Wu AW, Wilson MH, Abboud PA, et al. Why don't  
17  
18  
19 6 physicians follow clinical practice guidelines? A framework for improvement.  
20  
21  
22 7 *JAMA.*1999;28:1458-65. Review.  
23  
24  
25 8 [15] Barth JH, Misra S, Aakre KM, Langlois MR, Watine J, Twomey PJ, et al. Why are  
26  
27  
28 9 clinical practice guidelines not followed? *Clin Chem Lab Med.*2016;54:1133-39.  
29  
30  
31 10 [16] Taba P, Rosenthal M, Habicht J, Tarien H, Mathiesen M, Hill S, et al. Barriers and  
32  
33  
34 11 facilitators to the implementation of clinical practice guidelines: a cross-sectional survey  
35  
36  
37 12 among physicians in Estonia. *BMC Health Serv Res.*2012;12:455  
38  
39  
40 13 [17] Lyons SS, Tripp-Reimer T, Sorofman BA, Dewitt JE, Bootsmiller BJ, Vaughn TE, et al.  
41  
42  
43 14 VA QUERI informatics paper: information technology for clinical guideline implementation:  
44  
45  
46 15 perceptions of multidisciplinary stakeholders. *J Am Med Inform Assoc.* 2005;12:64-71.  
47  
48  
49 16 [18] De Vos M, Graafmans W, Kooistra M, Meijboom B, Van Der Voort P, Westert G. Using  
50  
51  
52 17 quality indicators to improve hospital care: a review of the literature. *Int J Qual Health*  
53  
54  
55 18 *Care.*2009;21;11.  
56  
57  
58 19 [19] Jones SS, Rudin RS, Perry T, Shekelle PG. Health information technology: an updated  
59  
60



- 1  
2  
3  
4 1 systematic review with a focus on meaningful use. *Ann Intern Med.* 2014;160: 48–54.  
5  
6  
7 2 [20] Chaudhry B, Wang J, Wu S, Maglione M, Mojica W, Roth E, et al. Systematic review:  
8  
9  
10 3 impact of health information technology on quality, efficiency, and costs of medical care. *Ann*  
11  
12  
13 4 *Intern Med.* 2006;144: 742–52.  
14  
15  
16 5 [21] Menachemi N, Chukmaitov A, Saunders C, Brooks RG. Hospital quality of care: does  
17  
18  
19 6 information technology matter? The relationship between information technology adoption  
20  
21  
22 7 and quality of care. *Health Care Manage Rev.* 2008;33: 51–9.  
23  
24  
25 8 [22] Medical Information Network Distribution Service (Minds).  
26  
27  
28 9 <http://minds.jcqhcc.or.jp/english/english.php> (accessed 7 June 2018).  
29  
30  
31 10 [23] Sasaki N, Lee J, Park S, Umegaki T, Kunisawa S, Otsubo T, et al. Development and  
32  
33  
34 11 validation of an acute heart failure-specific mortality predictive model based on  
35  
36  
37 12 administrative data. *Can J Cardiol.* 2013;29: 1055–61.  
38  
39  
40 13 [24] Hamada H, Sekimoto M, Imanaka Y. Effects of the per diem prospective payment  
41  
42  
43 14 system with DRG-like grouping system (DPC/PDPS) on resource usage and healthcare  
44  
45  
46 15 quality in Japan. *Health Policy.* 2012;107:194-201.  
47  
48  
49 16 [25] Japanese Association for Infectious Diseases, Japanese Society of Chemotherapy, ed.  
50  
51  
52 17 Guidelines for antibiotic use. Tokyo; Kyowa Kikaku.2005-2010.[Only in Japanese]  
53  
54  
55 18 [26] Kass, GV. An exploratory technique for investigating large quantities of categorical data.  
56  
57  
58 19 *Journal of Applied Statistics.*1980;29, 119-127.  
59  
60

- 1  
2  
3  
4 1 [27] Huang YH, Wu CY, Lin KC, Hsieh YW, Snow WM, Wang TN. Determinants of change  
5  
6  
7 2 in stroke-specific quality of life after distributed constraint-induced therapy. *Am J Occup Ther.*  
8  
9  
10 3 2013;67,54-63.  
11  
12  
13 4 [28] Dudley WN, Dilorio C, Soet J. Detecting and explicating interactions in categorical data.  
14  
15  
16 5 *Nurs Res.* 2000;49,53-6.  
17  
18  
19 6 [29] Nisbet R, Elder J, Miner G. *Handbook of Statistical Analysis and Data Mining*  
20  
21  
22 7 *Applications.* Academic Press. 2009  
23  
24  
25 8 [30] Maeda A, Araujo E, Cashin C, Harris J, Ikegami N, Reich MR. *Universal Health*  
26  
27  
28 9 *Coverage for Inclusive and Sustainable Development: A Synthesis of 11 Country Case*  
29  
30  
31 10 *Studies.* Washington, DC; The World Bank. 2014  
32  
33  
34 11 [31] Séror AC. Internet infrastructures and health care systems: a qualitative comparative  
35  
36  
37 12 analysis on networks and markets in the British National Health Service and Kaiser  
38  
39  
40 13 Permanente. *J Med Internet Res.* 2002;4,E21.  
41  
42  
43 14 [32] Peter J, Peredy G. *The Permanente knowledge connection: A national*  
44  
45  
46 15 *strategy for clinician use of web technology. Report of the web integration council -clinical*  
47  
48  
49 16 *subcommittee. The Permanente Journal.* 1998;2,69-75.  
50  
51  
52 17 [33] King DN. The contribution of hospital library information services to clinical care: a  
53  
54  
55 18 *study in eight hospitals. Bull Med Libr Assoc.* 1987;75,291-301.  
56  
57  
58 19 [34] Weightman AL, Williamson J; *Library & Knowledge Development Network (LKDN)*  
59  
60

- 1  
2  
3  
4 1 Quality and Statistics Group. The value and impact of information provided through library  
5  
6  
7 2 services for patient care: a systematic review. *Health Info Libr J.* 2005,22,4-25.  
8  
9  
10 3 [35] Chiu YW, Weng YH, Lo HL, Shih YH, Hsu CC, Kuo KN. Comparison of accessing  
11  
12  
13 4 online databases between physicians and nurses in Taiwan. *Inform Health Soc Care*  
14  
15  
16 5 2012;37:230-41.  
17  
18  
19 6 [36] Doebbeling BN, Chou AF, Tierney WM. Priorities and strategies for the implementation  
20  
21  
22 7 of integrated informatics and communications technology to improve evidence-based practice.  
23  
24  
25 8 *J Gen Intern Med.* 2006;21:S50-7.  
26  
27  
28 9 [37] Ministerio de Salud y Protección Social. Implementation manual for evidence-based  
29  
30  
31 10 clinical practice guidelines in health institutions in colombia.2014.  
32  
33  
34 11 [http://gpc.minsalud.gov.co/recursos/Documentos%20compartidos/Implementation\\_guide\\_ing](http://gpc.minsalud.gov.co/recursos/Documentos%20compartidos/Implementation_guide_ing)  
35  
36  
37 12 [les.pdf](#) (accessed 13 February 2019)  
38  
39  
40 13 [38] Hamilton AB, Mittman BS. Implementation science in health care. In: Brownson RC, et al,  
41  
42  
43 14 editor. *Dissemination and implementation research in health: translating science into*  
44  
45  
46 15 *practice.* 2<sup>nd</sup> ed. New York: Oxford University Press; 2018. p. 385-400.  
47  
48  
49 16 [39] Goodall AH. Physician-leaders and hospital performance: is there an association?  
50  
51  
52 17 *Soc Sci Med.* 2011;73:535-539.  
53  
54  
55 18 [40] Bloom N, Garicano L, Sadun R, Van Reenen J. The distinct effects of information  
56  
57  
58 19 technology and communication technology on firm organization. *Management*  
59  
60

1  
2  
3  
4  
5  
6  
7  
8  
9  
10  
11  
12  
13  
14  
15  
16  
17  
18  
19  
20  
21  
22  
23  
24  
25  
26  
27  
28  
29  
30  
31  
32  
33  
34  
35  
36  
37  
38  
39  
40  
41  
42  
43  
44  
45  
46  
47  
48  
49  
50  
51  
52  
53  
54  
55  
56  
57  
58  
59  
60

1 Science.2014;60:2859-2885.

For peer review only

1  
2  
3  
4 **1 Figure legends**  
5

6  
7 2 Figure 1. Flow diagram of the subject hospital selection process.  
8

9  
10 3 \*Target QI indicates QI of perioperative antibiotic prophylaxis of the 11 surgical procedures  
11  
12  
13 4 mentioned in the manuscript.  
14

15  
16 5 Figure 2. Information sources freely available or specifically provided by the participating  
17  
18  
19 6 hospitals (153 hospitals).  
20

21  
22 7 Figure 3. Chi-squared automatic interaction detection tree diagram showing the correlates of  
23  
24  
25 8 the QI score.  
26

27  
28 9 \* These values indicate the numbers of positive responses to questionnaire items related to (i)  
29  
30  
31 10 Electronic health records and Internet availability, (ii) wireless LAN availability, and (iii)  
32  
33  
34 11 wired LAN availability at outpatient clinics/wards. DB, database; LAN, local area network;  
35  
36  
37 12 QI, quality indicator; SD, standard deviation.  
38

39  
40 13 \*\* p=0.0499, in detail.  
41  
42  
43  
44  
45  
46  
47  
48  
49  
50  
51  
52  
53  
54  
55  
56  
57  
58  
59  
60

1

Table 1. Characteristics of the hospitals and respondents<sup>a</sup> (153 hospitals)

| Hospital characteristics                    |                              |
|---------------------------------------------|------------------------------|
| Beds, mean $\pm$ SD (range); median         | 339 $\pm$ 182 (63-1161); 303 |
| Teaching hospitals, n(%)                    | 115 (75.2)                   |
| Hospital size, n(%)                         |                              |
| > 500 beds                                  | 25 (16.3)                    |
| $\leq$ 500 beds                             | 128 (83.7)                   |
| Full-time physicians, mean $\pm$ SD (range) | 61.9 $\pm$ 43.3 (8-268)      |
| Resident physicians, mean $\pm$ SD (range)  | 21.2 $\pm$ 29.2 (0-197)      |
| Respondent characteristics                  |                              |
|                                             | n (%)                        |
| Sex                                         |                              |
| Male                                        | 125 (81.7)                   |
| Female                                      | 19 (12.4)                    |
| No response                                 | 9 (5.9)                      |
| Age                                         |                              |
| 20–29 years                                 | 5 (3.3)                      |
| 30–39 years                                 | 21 (13.7)                    |
| 40–49 years                                 | 28 (18.3)                    |
| 50–59 years                                 | 50 (32.7)                    |
| 60–69 years                                 | 39 (25.5)                    |
| No response                                 | 10 (6.5)                     |
| Appointment                                 |                              |
| Hospital administrator (physician)          | 69 (45.1)                    |
| Chief general manager (non-physician)       | 38 (24.8)                    |
| Others                                      | 34 (22.2)                    |
| No response                                 | 12 (7.8)                     |

<sup>a</sup> Respondents answered the questions as representatives of their hospital.

SD, standard deviation.

2

Table 2. Hospital policies and IT infrastructure (153 hospitals)

| Questionnaire items                                                                                | n (%)      |
|----------------------------------------------------------------------------------------------------|------------|
| Hospital policies                                                                                  |            |
| Explicit policy to enhance IT infrastructure to improve accessibility to medical information (YES) | 144 (94.1) |
| Explicit recommendation for the utilization of evidence-based medicine (YES)                       | 88 (57.5)  |
| Explicit recommendation for adherence to clinical practice guidelines (YES)                        | 84 (54.9)  |
| Accessibility to the Internet and other information sources                                        |            |
| Electronic health records and Internet access                                                      |            |
| Access to both electronic health records and the Internet                                          | 110 (71.9) |
| Other                                                                                              | 43 (28.1)  |
| Wireless LAN                                                                                       |            |
| Available with no limitations/with limited access points                                           | 110 (71.9) |
| Not available                                                                                      | 43 (28.1)  |
| Major locations with wired LAN access ( <i>Multiple answers allowed</i> )                          |            |
| Outpatient clinics/wards                                                                           | 98 (64.1)  |
| Other locations (including medical offices and library)                                            | 144 (94.1) |
| Access to paid medical evidence databases ( <i>Multiple answers allowed</i> )                      |            |
| <i>Igaku Chuo Zasshi</i> (ICHUSHI) Database <in Japanese>                                          | 118 (77.1) |
| Medical databases such as UpToDate®, Clinical Key®, Ovid®, and DynaMed®                            | 84 (54.9)  |
| Medical library and intranet usability within the hospital                                         |            |
| Provision of an intranet homepage with user-friendly interface                                     | 42 (27.5)  |
| Number of full-time medical librarians                                                             |            |
| ≥ 1                                                                                                | 66 (43.1)  |
| 0                                                                                                  | 87 (56.9)  |
| Medical library activities ( <i>Multiple answers allowed</i> )                                     |            |
| Periodic meetings held to improve the information retrieval environment                            | 84 (54.9)  |
| Continuously working to improve library services and usability                                     | 60 (39.2)  |
| Participation in hospital librarian associations and communication with other hospital librarians  | 25 (16.3)  |
| Other                                                                                              | 23 (15.0)  |

2 IT, information technology, LAN, local area network.

3

1

Table 3. QI scores of hospital groups according to the number of positive responses to questionnaire items on hospital policies, IT infrastructure, and hospital size (153 hospitals)

| Number of questionnaire items with positive responses                    | Mean QI score | n  |
|--------------------------------------------------------------------------|---------------|----|
| Hospital policies <sup>a</sup>                                           |               |    |
| 0                                                                        | 78.73         | 4  |
| 1                                                                        | 81.92         | 51 |
| 2                                                                        | 84.95         | 29 |
| 3                                                                        | 78.92         | 69 |
| IT infrastructure                                                        |               |    |
| Accessibility to the Internet and other information sources <sup>b</sup> |               |    |
| 0                                                                        | 78.59         | 5  |
| 1                                                                        | 82.20         | 32 |
| 2                                                                        | 78.70         | 62 |
| 3                                                                        | 83.32         | 54 |
| Access to paid medical evidence databases <sup>c</sup>                   |               |    |
| 0                                                                        | 72.55         | 25 |
| 1                                                                        | 79.76         | 54 |
| 2                                                                        | 84.88         | 74 |
| Medical library and intranet usability within the hospital <sup>d</sup>  |               |    |
| 0                                                                        | 81.70         | 21 |
| 1                                                                        | 78.45         | 45 |
| 2                                                                        | 80.25         | 39 |
| 3                                                                        | 84.40         | 26 |
| 4–6                                                                      | 83.27         | 22 |
| Hospital size and teaching status                                        |               |    |
| > 500-bed non-teaching                                                   | 87.64         | 4  |
| > 500-bed teaching                                                       | 83.28         | 21 |
| ≤ 500-bed teaching                                                       | 83.16         | 94 |
| ≤ 500-bed non-teaching                                                   | 73.10         | 34 |

Questionnaire items are as follows:

<sup>a</sup> Three items: having explicit policy to enhance IT infrastructure, explicit recommendation for the utilization of evidence-based medicine, and explicit recommendation to use clinical practice guidelines.

<sup>b</sup> Three items: Electronic health records and Internet availability, wireless LAN availability, wired LAN availability at outpatient clinics/wards.

<sup>c</sup> Two items: provision of access to the Japanese medical database and access to English-language medical databases.

<sup>d</sup> Six items: provision of access to an intranet homepage, one or more full-time medical librarians, periodic meetings for library improvement, continuously working to improve library services and usability, communication with other hospital librarians, and others.

IT, information technology; LAN, local area network; QI, quality indicator.

2



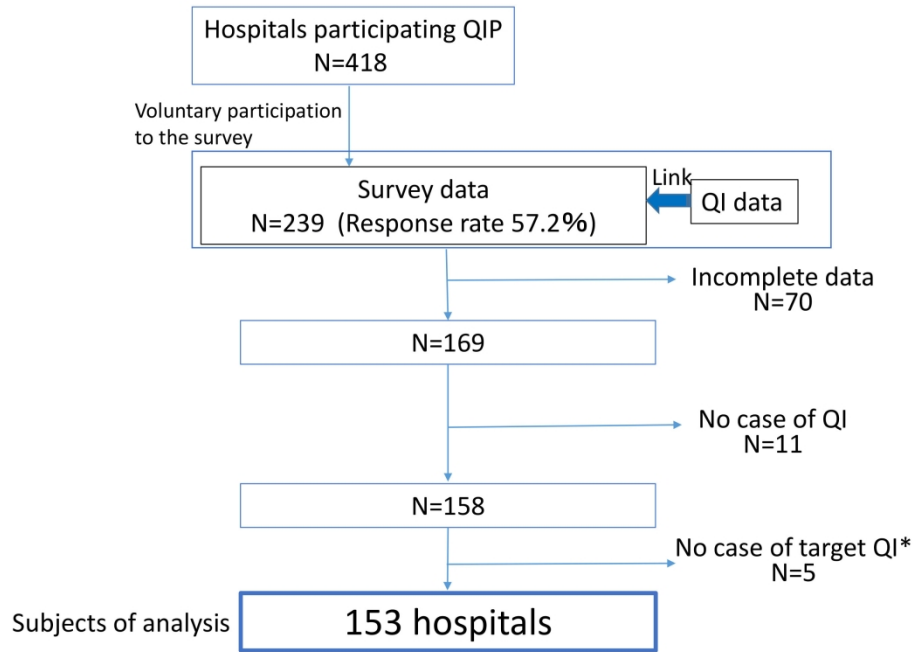

Figure 1. Flow diagram of the subject hospital selection process.

\*Target QI indicates QI of perioperative antibiotic prophylaxis of the 11 surgical procedures mentioned in the manuscript.

254x190mm (300 x 300 DPI)

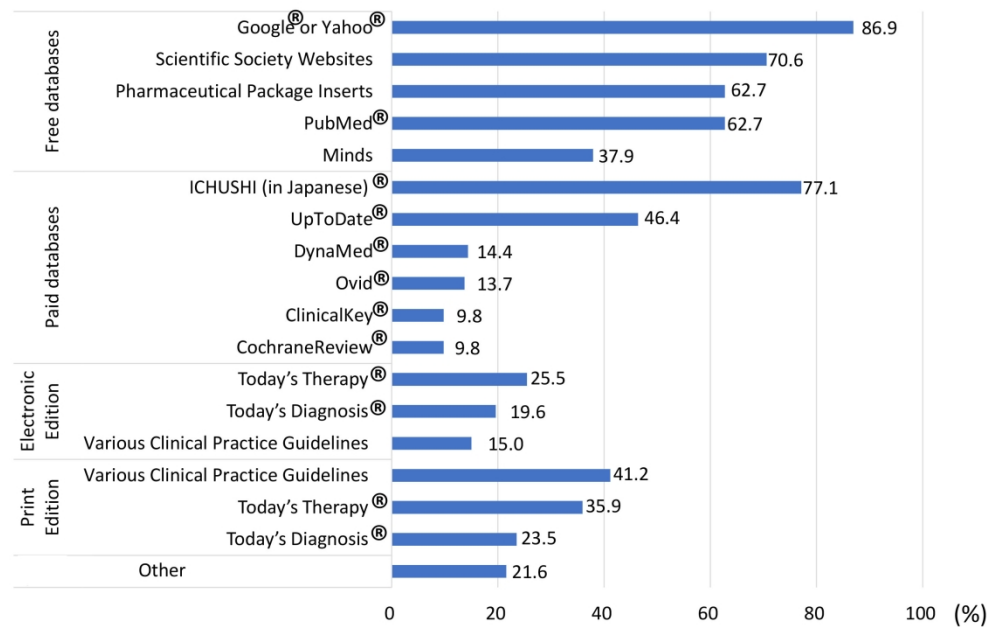

Figure 2. Information sources freely available or specifically provided by the participating hospitals (153 hospitals).

245x158mm (300 x 300 DPI)

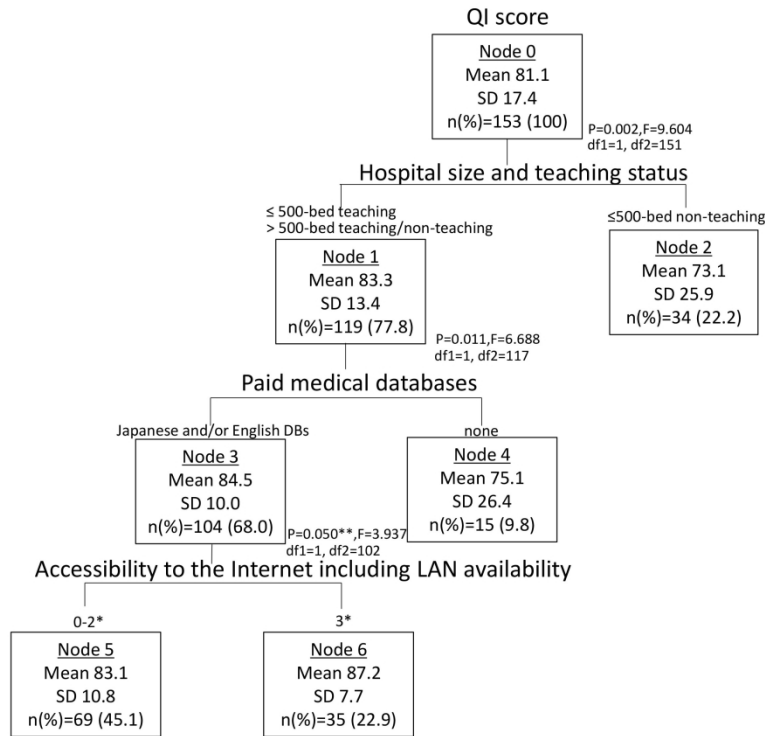

Figure 3. Chi-squared automatic interaction detection tree diagram showing the correlates of the QI score.

\* These values indicate the numbers of positive responses to questionnaire items related to (i) Electronic health records and Internet availability, (ii) wireless LAN availability, and (iii) wired LAN availability at outpatient clinics/wards. DB, database; LAN, local area network; QI, quality indicator; SD, standard deviation.

\*\*  $p=0.0499$ , in detail.

254x190mm (300 x 300 DPI)

## Appendix\_Table. Original Questions

Q1-1. Does your hospital have an explicit policy to enhance IT infrastructure in order to improve accessibility to medical information?

- Yes  No  Other

Q1-2. What information sources are available in your hospital? (Please choose all options that would apply)

1. PubMed  2. Google/Yahoo  3. Pharmaceutical Package Inserts  4. Pharmaceutical Interview Forms  
 5. Scientific Society Websites  6. MINDS  
 7. *Igaku Chuo Zasshi* (ICHUSHI) Medical Literature Database [**Hospital** Subscription]  
 8. *Igaku Chuo Zasshi* (ICHUSHI) Medical Literature Database [**Medical Office** Subscription]  
 9. UpToDate [**Hospital** Subscription]  10. UpToDate [**Medical Office** Subscription]  
 11. Cochrane Review  12. ClinicalKey  13. Ovid  14. DynaMed  
 15. *Today's Diagnosis* [**Electronic Edition**]  16. *Today's Therapy* [**Electronic Edition**]  
 17. Various Clinical Practice Guidelines [**Electronic Versions**]  
 18. *Today's Diagnosis* [**Print Edition**]  19. *Today's Therapy* [**Print Edition**]  
 20. Various Clinical Practice Guidelines [**Print Versions**]  21. Other

Q2-1. What type of accessibility to the Internet and other information sources is available in your hospital?

- Access to both electronic health records (EHRs) and the Internet is permitted from the same computer.  
 Access to both EHRs and the Internet is permitted from different computers.  
 Access to EHRs is permitted only in the hospital network. Therefore, healthcare workers have to use their own computers to access the Internet.  
 EHRs are not available.  
 Other

Q2-2. Is *wireless* LAN available in your hospital?

- Yes, available with no limitations.  Yes, with limited access points.  No, not available.

Q2-3. Where are the major locations in your hospital for Internet use with *wired* LAN access? (*Multiple answers allowed*)

- Outpatient clinics  Wards  Medical offices  Libraries  
 Other

Q3-1. How many librarians are there in your hospital?

- Full-time:  Part-time:

Q3-2. Does your hospital provide an intranet homepage with user-friendly interface?

- Yes  No  Other

Q3-3. Which applies to your hospital regarding medical library activities? (*Multiple answers allowed*)

- Periodic meetings held to improve the information retrieval environment  
 Continuously working to improve library services and usability (e.g., promoting paperless movements)  
 Participation in hospital librarian associations and communication with other hospital librarians  
 Other

Q4. Do you have an explicit recommendation for the utilization of evidence-based medicine in your hospital?

- Yes  No  Other

Q5. Do you have an explicit recommendation for adherence to clinical practice guidelines in your hospital?

- Yes  No  Other

**STROBE 2007 (v4) Statement—Checklist of items that should be included in reports of *cross-sectional studies***

| Section/Topic                | Item # | Recommendation                                                                                                                                                                       | Reported on page # |
|------------------------------|--------|--------------------------------------------------------------------------------------------------------------------------------------------------------------------------------------|--------------------|
| <b>Title and abstract</b>    | 1      | (a) Indicate the study's design with a commonly used term in the title or the abstract                                                                                               | 1                  |
|                              |        | (b) Provide in the abstract an informative and balanced summary of what was done and what was found                                                                                  | 2-3                |
| <b>Introduction</b>          |        |                                                                                                                                                                                      |                    |
| Background/rationale         | 2      | Explain the scientific background and rationale for the investigation being reported                                                                                                 | 2, 5-6             |
| Objectives                   | 3      | State specific objectives, including any prespecified hypotheses                                                                                                                     | 2,6                |
| <b>Methods</b>               |        |                                                                                                                                                                                      |                    |
| Study design                 | 4      | Present key elements of study design early in the paper                                                                                                                              | 2,7-8              |
| Setting                      | 5      | Describe the setting, locations, and relevant dates, including periods of recruitment, exposure, follow-up, and data collection                                                      | 2,7-11             |
| Participants                 | 6      | (a) Give the eligibility criteria, and the sources and methods of selection of participants                                                                                          | 7-8                |
| Variables                    | 7      | Clearly define all outcomes, exposures, predictors, potential confounders, and effect modifiers. Give diagnostic criteria, if applicable                                             | 7-11               |
| Data sources/<br>measurement | 8*     | For each variable of interest, give sources of data and details of methods of assessment (measurement). Describe comparability of assessment methods if there is more than one group | 7-11               |
| Bias                         | 9      | Describe any efforts to address potential sources of bias                                                                                                                            | 17                 |
| Study size                   | 10     | Explain how the study size was arrived at                                                                                                                                            | 7-11               |
| Quantitative variables       | 11     | Explain how quantitative variables were handled in the analyses. If applicable, describe which groupings were chosen and why                                                         | 7-11, Table3       |
| Statistical methods          | 12     | (a) Describe all statistical methods, including those used to control for confounding                                                                                                | 9-11               |
|                              |        | (b) Describe any methods used to examine subgroups and interactions                                                                                                                  | 9-11               |
|                              |        | (c) Explain how missing data were addressed                                                                                                                                          | Fig1.              |
|                              |        | (d) If applicable, describe analytical methods taking account of sampling strategy                                                                                                   | *                  |
|                              |        | (e) Describe any sensitivity analyses                                                                                                                                                | *                  |
| <b>Results</b>               |        |                                                                                                                                                                                      |                    |

|                          |     |                                                                                                                                                                                                              |                          |
|--------------------------|-----|--------------------------------------------------------------------------------------------------------------------------------------------------------------------------------------------------------------|--------------------------|
| Participants             | 13* | (a) Report numbers of individuals at each stage of study—eg numbers potentially eligible, examined for eligibility, confirmed eligible, included in the study, completing follow-up, and analysed            | 11, Fig1.                |
|                          |     | (b) Give reasons for non-participation at each stage                                                                                                                                                         | *                        |
|                          |     | (c) Consider use of a flow diagram                                                                                                                                                                           | 11, Fig1.                |
| Descriptive data         | 14* | (a) Give characteristics of study participants (eg demographic, clinical, social) and information on exposures and potential confounders                                                                     | 11, Table 1.             |
|                          |     | (b) Indicate number of participants with missing data for each variable of interest                                                                                                                          | Fig1.                    |
| Outcome data             | 15* | Report numbers of outcome events or summary measures                                                                                                                                                         | Table 3. Figure 2.       |
| Main results             | 16  | (a) Give unadjusted estimates and, if applicable, confounder-adjusted estimates and their precision (eg, 95% confidence interval). Make clear which confounders were adjusted for and why they were included | 11-13, Table 2.          |
|                          |     | (b) Report category boundaries when continuous variables were categorized                                                                                                                                    | 11-13, Table 3           |
|                          |     | (c) If relevant, consider translating estimates of relative risk into absolute risk for a meaningful time period                                                                                             | *                        |
| Other analyses           | 17  | Report other analyses done—eg analyses of subgroups and interactions, and sensitivity analyses                                                                                                               | 11-13, Table 3 Figure 3. |
| <b>Discussion</b>        |     |                                                                                                                                                                                                              |                          |
| Key results              | 18  | Summarise key results with reference to study objectives                                                                                                                                                     | 2-4,13,17-18             |
| Limitations              | 19  | Discuss limitations of the study, taking into account sources of potential bias or imprecision. Discuss both direction and magnitude of any potential bias                                                   | 4, 17-18                 |
| Interpretation           | 20  | Give a cautious overall interpretation of results considering objectives, limitations, multiplicity of analyses, results from similar studies, and other relevant evidence                                   | 4,13-18                  |
| Generalisability         | 21  | Discuss the generalisability (external validity) of the study results                                                                                                                                        | 4,18                     |
| <b>Other information</b> |     |                                                                                                                                                                                                              |                          |
| Funding                  | 22  | Give the source of funding and the role of the funders for the present study and, if applicable, for the original study on which the present article is based                                                | 20                       |

\*Give information separately for cases and controls in case-control studies and, if applicable, for exposed and unexposed groups in cohort and cross-sectional studies.

**Note:** An Explanation and Elaboration article discusses each checklist item and gives methodological background and published examples of transparent reporting. The STROBE checklist is best used in conjunction with this article (freely available on the Web sites of PLoS Medicine at <http://www.plosmedicine.org/>, Annals of Internal Medicine at <http://www.annals.org/>, and Epidemiology at <http://www.epidem.com/>). Information on the STROBE Initiative is available at [www.strobe-statement.org](http://www.strobe-statement.org).
