# Supplementary material for: Does hospital information technology infrastructure promote the implementation of clinical practice guidelines? A multicentre observational study of Japanese hospitals
Source: PubMed Central journal article supplement — BMJ Open. 2019 Jun 14;9(6):e024700. doi: 10.1136/bmjopen-2018-024700 (PMC6588970; doi:10.1136/bmjopen-2018-024700), 2019-06-14
Supplement: bmjopen-2018-024700supp001.pdf [file bmjopen-2018-024700supp001.pdf]

Appendix\_Table. Original Questions

---

Q1-1. Does your hospital have an explicit policy to enhance IT infrastructure in order to improve accessibility to medical information?

- Yes  No  Other

Q1-2. What information sources are available in your hospital? (Please choose all options that would apply)

1. PubMed  2. Google/Yahoo  3. Pharmaceutical Package Inserts  4. Pharmaceutical Interview Forms  
 5. Scientific Society Websites  6. MINDS  
 7. *Igaku Chuo Zasshi* (ICHUSHI) Medical Literature Database [**Hospital** Subscription]  
 8. *Igaku Chuo Zasshi* (ICHUSHI) Medical Literature Database [**Medical Office** Subscription]  
 9. UpToDate [**Hospital** Subscription]  10. UpToDate [**Medical Office** Subscription]  
 11. Cochrane Review  12. ClinicalKey  13. Ovid  14. DynaMed  
 15. *Today's Diagnosis* [**Electronic Edition**]  16. *Today's Therapy* [**Electronic Edition**]  
 17. Various Clinical Practice Guidelines [**Electronic Versions**]  
 18. *Today's Diagnosis* [**Print Edition**]  19. *Today's Therapy* [**Print Edition**]  
 20. Various Clinical Practice Guidelines [**Print Versions**]  21. Other

Q2-1. What type of accessibility to the Internet and other information sources is available in your hospital?

- Access to both electronic health records (EHRs) and the Internet is permitted from the same computer.  
 Access to both EHRs and the Internet is permitted from different computers.  
 Access to EHRs is permitted only in the hospital network. Therefore, healthcare workers have to use their own computers to access the Internet.  
 EHRs are not available.  
 Other

Q2-2. Is *wireless* LAN available in your hospital?

- Yes, available with no limitations.  Yes, with limited access points.  No, not available.

Q2-3. Where are the major locations in your hospital for Internet use with *wired* LAN access? (*Multiple answers allowed*)

- Outpatient clinics  Wards  Medical offices  Libraries  
 Other

Q3-1. How many librarians are there in your hospital?

- Full-time:  Part-time:

Q3-2. Does your hospital provide an intranet homepage with user-friendly interface?

- Yes  No  Other

Q3-3. Which applies to your hospital regarding medical library activities? (*Multiple answers allowed*)

- Periodic meetings held to improve the information retrieval environment  
 Continuously working to improve library services and usability (e.g., promoting paperless movements)  
 Participation in hospital librarian associations and communication with other hospital librarians  
 Other

Q4. Do you have an explicit recommendation for the utilization of evidence-based medicine in your hospital?

- Yes  No  Other

Q5. Do you have an explicit recommendation for adherence to clinical practice guidelines in your hospital?

- Yes  No  Other
-
